# Supplementary material for: A comprehensive understanding of the mechanism of the biomimetic total synthesis of brevianamide A
Source: Royal Society of Chemistry journal article supplement (doi:10.1039/d4ob00915k), 2024-01-01
Supplement: d4ob00915k1.pdf [file d4ob00915k1.pdf]

## Supplementary Information

### Complete details of methods:

For each structure, we used the CREST<sup>1</sup> tool of Grimme's group to perform conformational sampling, which was pre-optimized using GFN2-xTB<sup>2</sup>. Plausible conformations for the five-membered ring and the orientation of hydroxyl group were added manually for the transition state. We optimize the geometries of all stationary points in gas phase using the range-separated dispersion-corrected M06-2X<sup>3</sup> density functional and the 6-31+G(d,p)<sup>4,8</sup> basis set with Grimme's D3<sup>9</sup> correction using the original D3 damping function. M06-2X with D3 dispersion is robust, reliable and accurate<sup>10</sup> combination that has been demonstrated in previous studies. We performed vibrational frequency calculations to verify that stationary points were either minima or first-order saddle points on the potential energy surface and to calculate thermal corrections to Gibbs free energies at 298.15 K (25°C). The computed thermochemistry data were corrected using Grimme's quasi-harmonic (QHA) model for entropy<sup>11</sup> with a frequency cut-off value of 100.0 cm<sup>-1</sup> using the GoodVibes program<sup>12</sup>. Also, GoodVibes applied a 1 M concentration correction to account for reactions in solution and a vibrational scaling factor of 0.967 for M062X/6-31+G(d,p) level of theory as suggested<sup>13</sup>. We applied single-point energy corrections to these optimized structures. The single-point energy calculations were obtained using correlated wavefunction theory (WFT) (DLPNO-CCSD(T)/cc-pV(DT)Z)<sup>14-21</sup>. We used the integral equation formalism variant of the polarizable continuum model (IEF-PCM)<sup>22-26</sup> with the SMD solvation model (solvent=water)<sup>27</sup> to account for solvent effects. Domain-based local pair-natural orbital coupled cluster with perturbative triple excitations (DLPNO-CCSD(T)) calculations were carried out with ORCA 4.2<sup>28, 29</sup>. DLPNO-CCSD(T) energies with a normal truncation threshold ("normalPNO") show an accuracy of 1 kcal/mol or better compared to CCSD(T)<sup>30</sup>, which is generally recognized as a "gold standard" in computational chemistry<sup>31</sup>. Extrapolation to the basis set limit was carried out employing cc-pVDZ and cc-pVTZ energies, treating the convergence of SCF and correlation energies separately<sup>32</sup>. Gaussian 16<sup>33</sup> was employed for all density functional theory (DFT) calculations, using an "ultrafine" pruned (99,590) grid for numerical integration of the exchange-correlation functional and its derivatives. Representations in the main text and supporting information refer to the most stable rotameric conformation found for each step. Structure images of key transition states were generated by CYLview<sup>34</sup>, while non-covalent interaction analysis were represented using Multiwfn<sup>35</sup> and VMD<sup>36</sup> graphical interfaces.

**Supplementary Scheme 1** Calculations performed by Paton's group for route 2 and 3. Intermediate **5**, due to the high activation barrier, undergoes DA reaction before undergoing the migration reaction, forming the final products. However, the calculated selectivity does not match the experimental results, and the activation barriers of the migration reaction are excessively high.

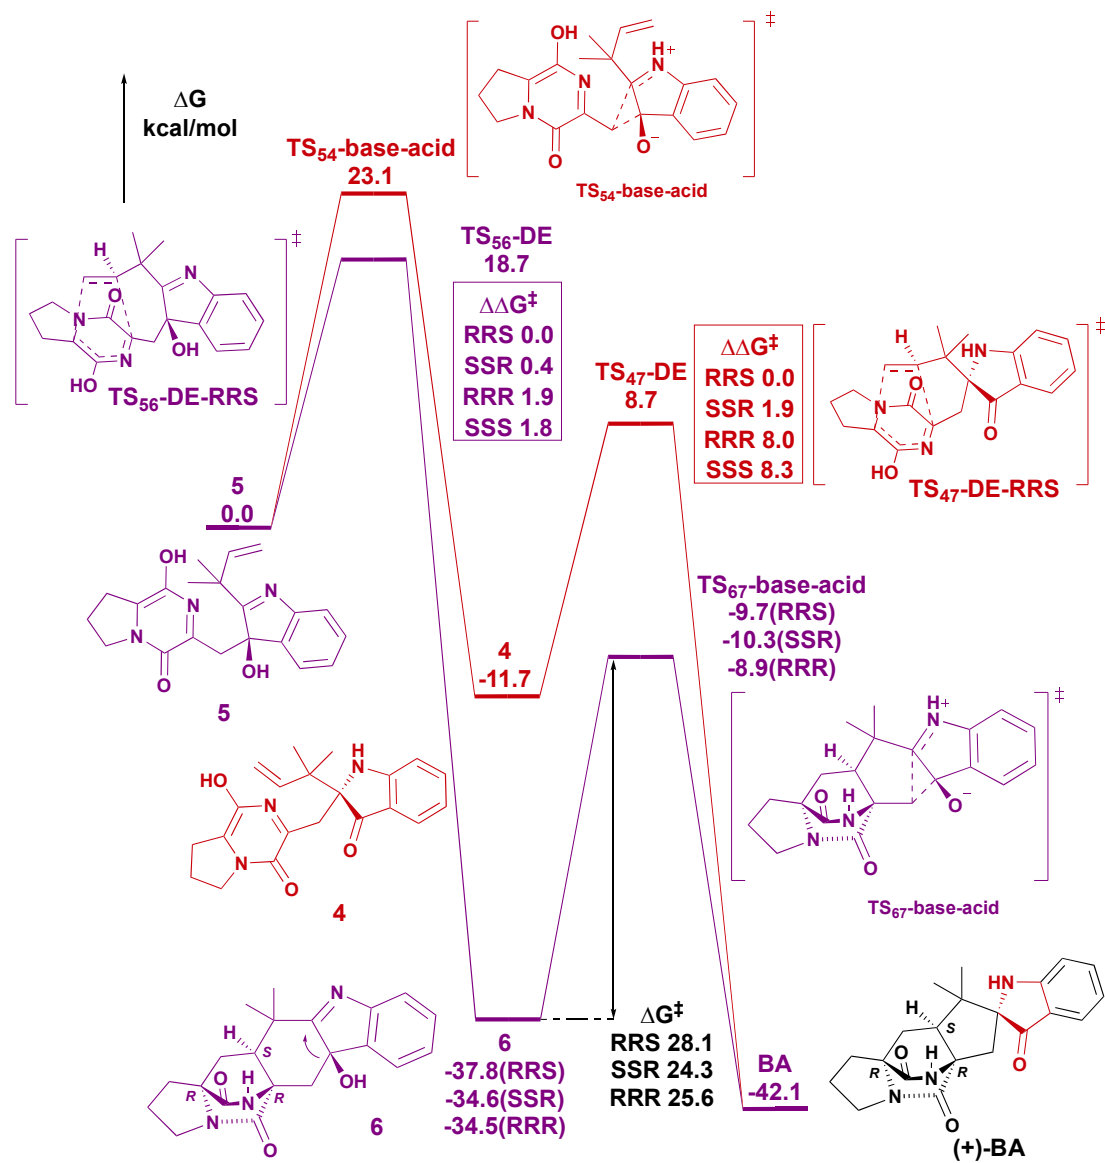

**Supplementary Figure 1** The four possible proton states during the migration reaction of intermediate **2**, along with the substrate free energy, transition state activation barrier, and reaction energy under the same substrate level. Key bond lengths (C2–C10 and C3–C10) are also listed in angstroms. Additionally, the relevant data and structures of intermediates **5** and **6** calculated using the base form are included.

|                  |             | R <sup>1</sup> | R <sup>2</sup> | G <sub>sub</sub> | ΔG <sup>‡</sup> | ΔG <sub>r</sub> | d(C3–C10) | d(C2–C10) |
|------------------|-------------|----------------|----------------|------------------|-----------------|-----------------|-----------|-----------|
| TS <sub>23</sub> | acid        | H              | H <sup>+</sup> | 44.5             | 72.3            | 45.4            | 1.99      | 2.02      |
|                  | <b>base</b> | ⊖              | Lp             | <b>-11.0</b>     | <b>8.4</b>      | <b>-22.4</b>    | 2.04      | 2.23      |
|                  | neutral     | H              | Lp             | 0.0              | 37.6            | 11.8            | 2.02      | 1.95      |
|                  | base-acid   | ⊖              | H <sup>+</sup> | 11.1             | 35.1            | -8.8            | 1.82      | 2.34      |
| TS <sub>54</sub> | <b>base</b> | ⊖              | Lp             | <b>-7.2</b>      | <b>0.3</b>      | <b>-14.9</b>    | 2.00      | 2.57      |
| TS <sub>67</sub> | <b>base</b> | ⊖              | Lp             | <b>-40.9</b>     | <b>-22.5</b>    | <b>-48.2</b>    | 2.03      | 2.12      |

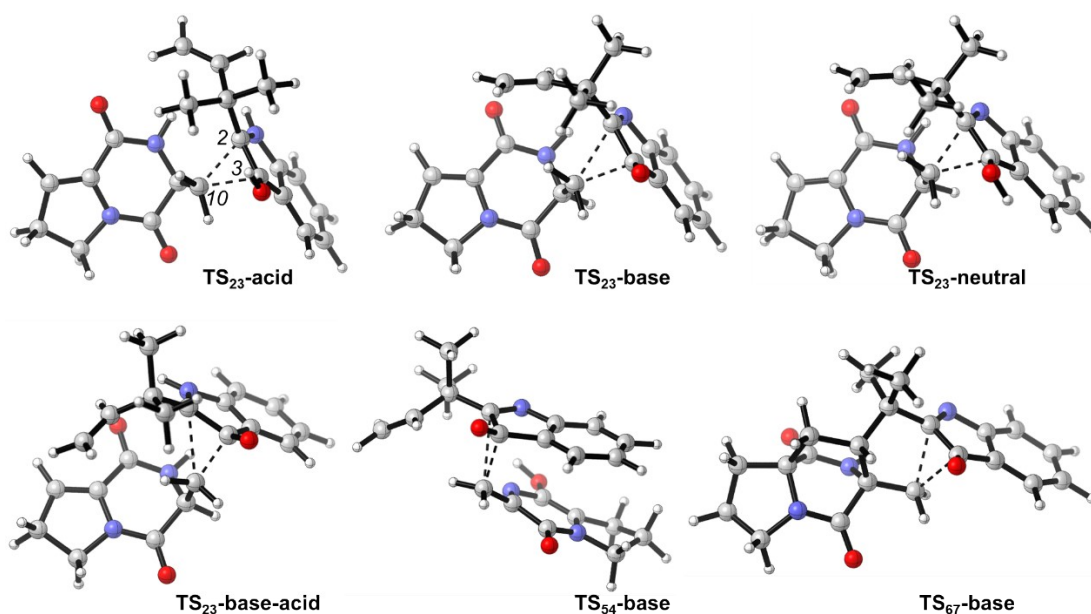

**Supplementary Figure 2** The comparison of transition state free energies of three different proton states during the migration of intermediate **2** is performed using different clusters, where the transition state of the base-acid form is consistently found to be lower than that of the neutral form under the same substrate level.

| H <sub>2</sub> O cluster | OH <sup>-</sup> cluster           | <b>TS<sub>23<sup>-</sup></sub><br/>base-acid</b> | <b>TS<sub>23<sup>-</sup></sub><br/>base</b> | <b>TS<sub>23<sup>-</sup></sub><br/>acid</b> |
|--------------------------|-----------------------------------|--------------------------------------------------|---------------------------------------------|---------------------------------------------|
| 1H <sub>2</sub> O        | OH <sup>-</sup>                   | 0.0                                              | -26.7                                       | 37.3                                        |
| 2H <sub>2</sub> O        | 1H <sub>2</sub> O+OH <sup>-</sup> | 0.0                                              | -19.0                                       | 29.5                                        |
| 3H <sub>2</sub> O        | 2H <sub>2</sub> O+OH <sup>-</sup> | 0.0                                              | -14.4                                       | 25.0                                        |
| 4H <sub>2</sub> O        | 3H <sub>2</sub> O+OH <sup>-</sup> | 0.0                                              | -13.3                                       | 23.9                                        |
| 5H <sub>2</sub> O        | 4H <sub>2</sub> O+OH <sup>-</sup> | 0.0                                              | -12.8                                       | 23.4                                        |
| 6H <sub>2</sub> O        | 5H <sub>2</sub> O+OH <sup>-</sup> | 0.0                                              | -9.5                                        | 20.0                                        |

**Supplementary Figure 3** Complete potential energy surface for the three routes, providing the relative free energy for each configuration in the four DA reactions.

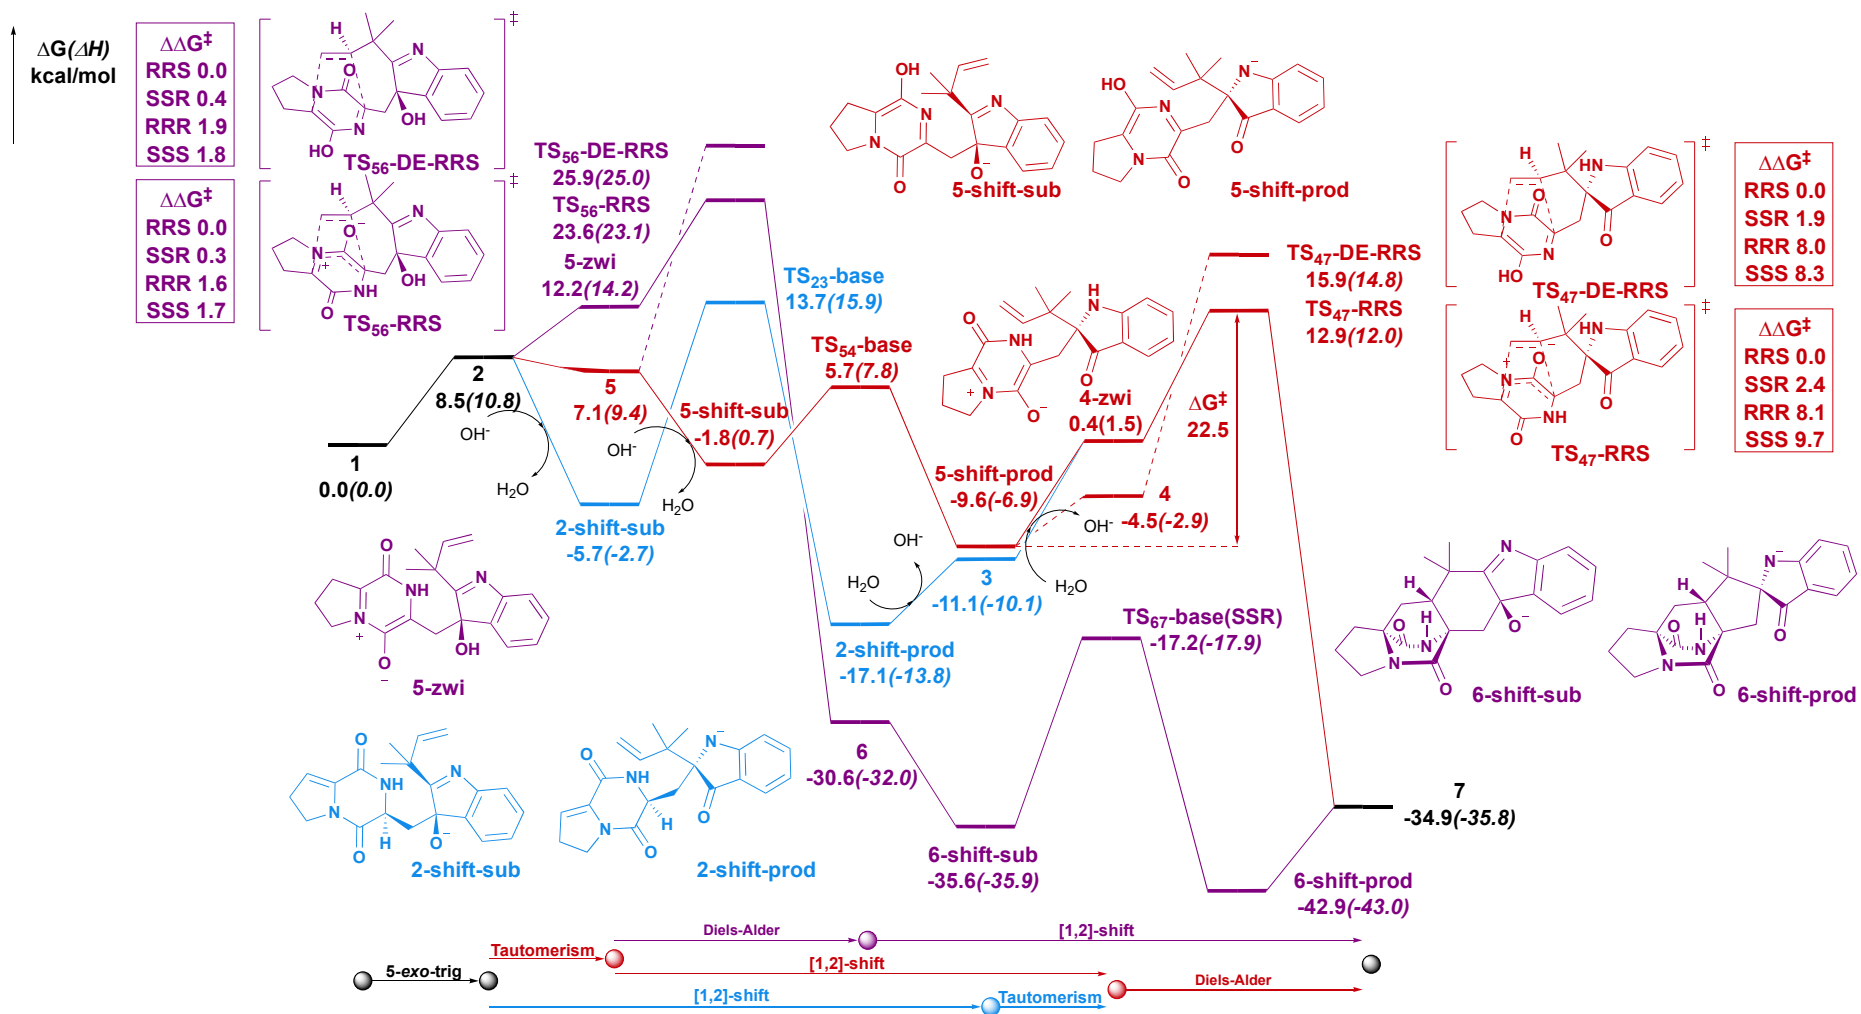



**Supplementary Figure 4** Comparison of overall reaction barriers for routes 1 and 3 using the form of cluster hydrated hydroxides.  $n$  denotes the number of water molecules in the cluster, and  $x$  denotes the free energy of the potential energy surface of the migration reaction that is elevated because of the difference in the clusters.

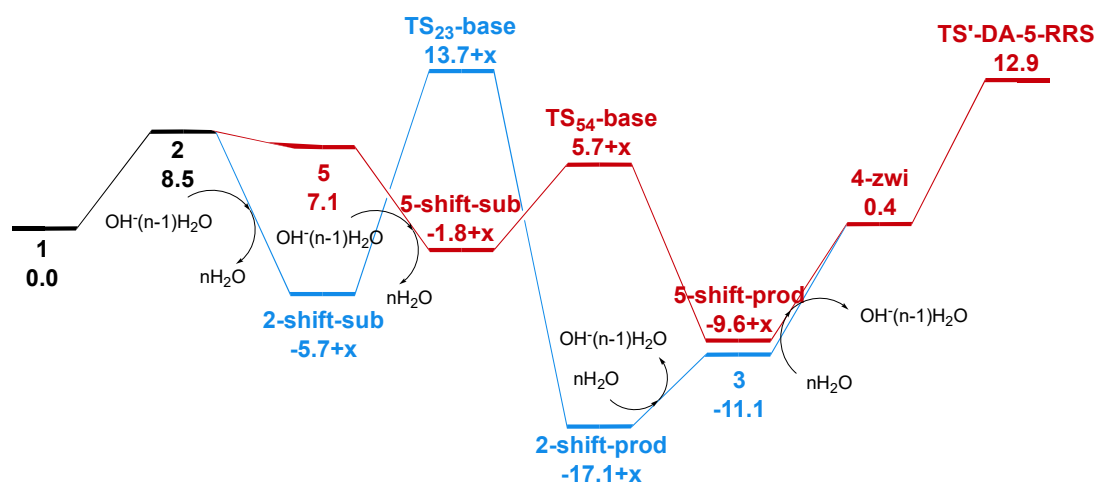

| $n$ | $x$  | $\Delta G^\ddagger$ of route 3 | $\Delta G^\ddagger$ of route 1 |
|-----|------|--------------------------------|--------------------------------|
| 1   | 0.0  | 22.5                           | 30.0                           |
| 2   | 7.7  | 14.8                           | 24.0                           |
| 3   | 12.3 | 18.0                           | 26.0                           |
| 4   | 13.4 | 19.1                           | 27.1                           |
| 5   | 13.9 | 19.6                           | 27.6                           |
| 6   | 17.2 | 22.9                           | 30.9                           |

**Supplementary Figure 5** Structure of the  $TS_{47}$  configurations are presented. Key NBO charges, bond lengths (in angstroms), angles and dihedral data for the four structures are also provided.

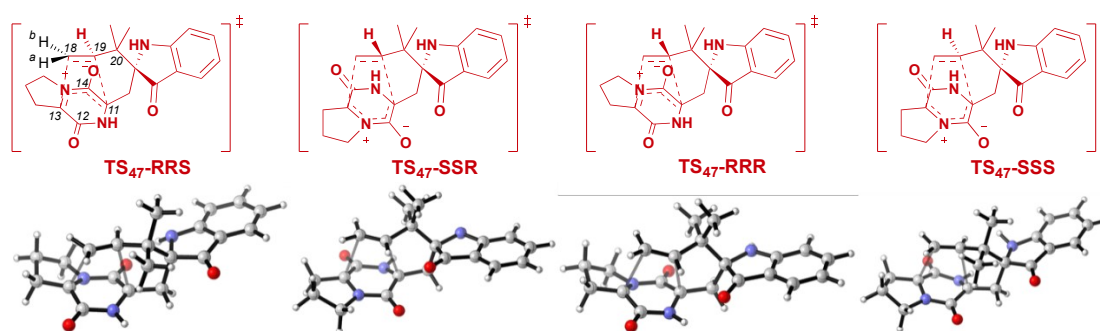

|     | NBO charge (C18) | NBO charge (C11) | d(C19-C11) | $\angle$ (Ha-C18-Hb) | $\angle$ (C18-C13-N) | $\angle$ (C19-C11-C14) | $\angle$ (C19-C11-N) | $\psi$ (C13-C12-N-C11) |
|-----|------------------|------------------|------------|----------------------|----------------------|------------------------|----------------------|------------------------|
| RRS | -0.496           | 0.134            | 2.34       | 115.6                | 98.2                 | 84.3                   | 101.7                | 8.6                    |
| SSR | -0.495           | 0.114            | 2.35       | 115.8                | 97.2                 | 89.4                   | 99.7                 | -10.2                  |
| RRR | -0.485           | 0.097            | 2.30       | 116.8                | 94.0                 | 102.6                  | 89.4                 | 13.6                   |
| SSS | -0.479           | 0.107            | 2.30       | 116.9                | 93.9                 | 102.6                  | 89.8                 | -15.2                  |



**Supplementary Table 1** Thermodynamic energies and coordinates

| Structure              | E            | ZPE      | H            | T.S      | T.qh-S   | G(T)         | qh-G(T)      | im freq | Ehigh        | TCH      | H_water      | qh-G(T)_water |
|------------------------|--------------|----------|--------------|----------|----------|--------------|--------------|---------|--------------|----------|--------------|---------------|
| 1                      | -1203.594133 | 0.402791 | -1203.166955 | 0.072041 | 0.069434 | -1203.238996 | -1203.236389 |         | -1202.592473 | 0.427178 | -1202.165295 | -1202.234729  |
| 2                      | -1203.570198 | 0.400603 | -1203.143788 | 0.077163 | 0.073088 | -1203.220951 | -1203.216876 |         | -1202.574497 | 0.426410 | -1202.148087 | -1202.221175  |
| 2-shift-acid-prod      | -1203.948765 | 0.413368 | -1203.509626 | 0.076939 | 0.073082 | -1203.586565 | -1203.582708 |         | -1203.017793 | 0.439139 | -1202.578654 | -1202.651736  |
| 2-shift-acid-sub       | -1203.943903 | 0.413027 | -1203.504662 | 0.078162 | 0.073950 | -1203.582824 | -1203.578612 |         | -1203.018500 | 0.439241 | -1202.579259 | -1202.653209  |
| 2-shift-base-acid-prod | -1203.591203 | 0.401083 | -1203.164439 | 0.077540 | 0.072907 | -1203.241980 | -1203.237347 |         | -1202.594214 | 0.426764 | -1202.167450 | -1202.240357  |
| 2-shift-base-acid-sub  | -1203.561244 | 0.401431 | -1203.134695 | 0.074764 | 0.071379 | -1203.209459 | -1203.206075 |         | -1202.563743 | 0.426549 | -1202.137194 | -1202.208573  |
| 2-shift-neutral-prod   | -1203.550245 | 0.400521 | -1203.123767 | 0.078669 | 0.073763 | -1203.202436 | -1203.197530 |         | -1202.560199 | 0.426478 | -1202.133721 | -1202.207484  |
| 2-shift-neutral-sub    | -1203.572740 | 0.400291 | -1203.146493 | 0.077068 | 0.073263 | -1203.223561 | -1203.219756 |         | -1202.579254 | 0.426247 | -1202.153007 | -1202.226270  |
| 2-shift-prod           | -1203.047646 | 0.386695 | -1202.635489 | 0.077435 | 0.072917 | -1202.712924 | -1202.708406 |         | -1202.103442 | 0.412157 | -1201.691285 | -1201.764202  |
| 2-shift-sub            | -1203.006933 | 0.386224 | -1202.595204 | 0.076166 | 0.072396 | -1202.671371 | -1202.667600 |         | -1202.085363 | 0.411729 | -1201.673634 | -1201.746030  |
| 3                      | -1203.603246 | 0.401288 | -1203.176713 | 0.073974 | 0.071135 | -1203.250687 | -1203.247848 |         | -1202.607847 | 0.426533 | -1202.181314 | -1202.252449  |
| 4                      | -1203.595058 | 0.400783 | -1203.168839 | 0.076091 | 0.071994 | -1203.244930 | -1203.240832 |         | -1202.596188 | 0.426219 | -1202.169969 | -1202.241963  |
| 4-zwi                  | -1203.578316 | 0.400908 | -1203.152308 | 0.074702 | 0.071127 | -1203.227010 | -1203.223435 |         | -1202.588945 | 0.426008 | -1202.162937 | -1202.234064  |
| 5                      | -1203.571572 | 0.399824 | -1203.145899 | 0.077534 | 0.073101 | -1203.223433 | -1203.219000 |         | -1202.575915 | 0.425673 | -1202.150242 | -1202.223343  |
| 5-shift-prod           | -1203.030637 | 0.386158 | -1202.619069 | 0.075580 | 0.071858 | -1202.694649 | -1202.690927 |         | -1202.091952 | 0.411568 | -1201.680384 | -1201.752242  |
| 5-shift-sub            | -1203.002816 | 0.385323 | -1202.592049 | 0.075085 | 0.071652 | -1202.667134 | -1202.663701 |         | -1202.078983 | 0.410767 | -1201.668216 | -1201.739868  |
| 5-zwi                  | -1203.552241 | 0.400070 | -1203.126810 | 0.077023 | 0.072584 | -1203.203833 | -1203.199394 |         | -1202.568128 | 0.425431 | -1202.142697 | -1202.215281  |
| 6-RRR                  | -1203.631823 | 0.405348 | -1203.202923 | 0.070139 | 0.067833 | -1203.273063 | -1203.270757 |         | -1202.639336 | 0.428900 | -1202.210436 | -1202.278269  |
| 6-RRS                  | -1203.639035 | 0.405622 | -1203.210053 | 0.069134 | 0.067271 | -1203.279187 | -1203.277324 |         | -1202.645213 | 0.428982 | -1202.216231 | -1202.283502  |
| 6-shift-prod-SSR       | -1203.089964 | 0.391334 | -1202.675372 | 0.069764 | 0.067443 | -1202.745135 | -1202.742815 |         | -1202.152492 | 0.414592 | -1201.737900 | -1201.805343  |
| 6-shift-sub-SSR        | -1203.060833 | 0.391240 | -1202.646468 | 0.069596 | 0.067146 | -1202.716064 | -1202.713614 |         | -1202.140860 | 0.414365 | -1201.726495 | -1201.793641  |
| 6-SSR                  | -1203.629706 | 0.405194 | -1203.200843 | 0.070510 | 0.068091 | -1203.271353 | -1203.268934 |         | -1202.639304 | 0.428863 | -1202.210441 | -1202.278532  |
| BA                     | -1203.642154 | 0.404945 | -1203.213617 | 0.070499 | 0.068011 | -1203.284116 | -1203.281628 |         | -1202.650912 | 0.428537 | -1202.222375 | -1202.290386  |
| H2O                    | -76.394984   | 0.020905 | -76.370298   | 0.018399 | 0.018399 | -76.388697   | -76.388697   |         | -76.391494   | 0.024686 | -76.366808   | -76.385207    |
| OH                     | -75.758884   | 0.008423 | -75.747156   | 0.016541 | 0.016541 | -75.763698   | -75.763698   |         | -75.882596   | 0.011728 | -75.870868   | -75.887409    |

|                |              |          |              |          |          |              |              |         |              |          |              |              |
|----------------|--------------|----------|--------------|----------|----------|--------------|--------------|---------|--------------|----------|--------------|--------------|
| TS23-acid      | -1203.899248 | 0.411449 | -1203.462160 | 0.076049 | 0.072376 | -1203.538209 | -1203.534536 | -379.82 | -1202.973490 | 0.437088 | -1202.536402 | -1202.608778 |
| TS23-base-acid | -1203.502637 | 0.398780 | -1203.078669 | 0.074770 | 0.071448 | -1203.153440 | -1203.150118 | -262.52 | -1202.522898 | 0.423968 | -1202.098930 | -1202.170378 |
| TS23-base      | -1202.990453 | 0.385115 | -1202.580385 | 0.074344 | 0.071133 | -1202.654729 | -1202.651518 | -287.05 | -1202.054047 | 0.410068 | -1201.643979 | -1201.715112 |
| TS23-neutral   | -1203.510677 | 0.398836 | -1203.086481 | 0.075536 | 0.071928 | -1203.162017 | -1203.158409 | -538.13 | -1202.518607 | 0.424196 | -1202.094411 | -1202.166339 |
| TS47-DE-RRR    | -1203.554924 | 0.401526 | -1203.129861 | 0.069446 | 0.067527 | -1203.199307 | -1203.197388 | -450.59 | -1202.554220 | 0.425063 | -1202.129157 | -1202.196684 |
| TS47-DE-RRS    | -1203.566064 | 0.401677 | -1203.140820 | 0.069452 | 0.067702 | -1203.210273 | -1203.208522 | -469.18 | -1202.566985 | 0.425244 | -1202.141741 | -1202.209443 |
| TS47-DE-SSR    | -1203.554863 | 0.400797 | -1203.130090 | 0.070769 | 0.068623 | -1203.200859 | -1203.198713 | -441.56 | -1202.562497 | 0.424773 | -1202.137724 | -1202.206347 |
| TS47-DE-SSS    | -1203.547573 | 0.401087 | -1203.122587 | 0.070649 | 0.068528 | -1203.193237 | -1203.191115 | -522.38 | -1202.552724 | 0.424986 | -1202.127738 | -1202.196266 |
| TS47-RRR       | -1203.546759 | 0.400612 | -1203.122099 | 0.070771 | 0.068718 | -1203.192870 | -1203.190817 | -423.49 | -1202.557249 | 0.424660 | -1202.132589 | -1202.201307 |
| TS47-RRS       | -1203.561754 | 0.401345 | -1203.136723 | 0.069824 | 0.068024 | -1203.206547 | -1203.204747 | -351.02 | -1202.571200 | 0.425031 | -1202.146169 | -1202.214193 |
| TS47-SSR       | -1203.545934 | 0.400327 | -1203.121479 | 0.071203 | 0.069022 | -1203.192682 | -1203.190501 | -316.74 | -1202.565784 | 0.424455 | -1202.141329 | -1202.210351 |
| TS47-SSS       | -1203.539024 | 0.400753 | -1203.114321 | 0.070751 | 0.068627 | -1203.185072 | -1203.182948 | -432.32 | -1202.554884 | 0.424703 | -1202.130181 | -1202.198808 |
| TS54-base      | -1203.000471 | 0.384422 | -1202.590956 | 0.073901 | 0.070955 | -1202.664857 | -1202.661911 | -183.67 | -1202.066485 | 0.409515 | -1201.656970 | -1201.727925 |
| TS54-neu       | -1203.506356 | 0.398230 | -1203.083003 | 0.074679 | 0.071180 | -1203.157682 | -1203.154183 | -34.84  | -1202.538698 | 0.423353 | -1202.115345 | -1202.186525 |
| TS56-DE-RRR    | -1203.539424 | 0.400933 | -1203.114556 | 0.070104 | 0.068290 | -1203.184660 | -1203.182847 | -451.71 | -1202.546955 | 0.424868 | -1202.122087 | -1202.190377 |
| TS56-DE-RRS    | -1203.542461 | 0.401179 | -1203.117518 | 0.069733 | 0.067973 | -1203.187251 | -1203.185492 | -464.00 | -1202.550412 | 0.424943 | -1202.125469 | -1202.193442 |
| TS56-DE-SSR    | -1203.546095 | 0.401448 | -1203.120993 | 0.069722 | 0.067760 | -1203.190715 | -1203.188753 | -476.44 | -1202.550200 | 0.425102 | -1202.125098 | -1202.192858 |
| TS56-DE-SSS    | -1203.541788 | 0.401124 | -1203.117064 | 0.069125 | 0.067592 | -1203.186189 | -1203.184657 | -450.54 | -1202.547674 | 0.424724 | -1202.122950 | -1202.190542 |
| TS56-RRR       | -1203.534732 | 0.400709 | -1203.109960 | 0.070872 | 0.068783 | -1203.180832 | -1203.178743 | -345.05 | -1202.550559 | 0.424772 | -1202.125787 | -1202.194570 |
| TS56-RRS       | -1203.539172 | 0.400732 | -1203.114425 | 0.070336 | 0.068593 | -1203.184761 | -1203.183018 | -347.48 | -1202.553285 | 0.424747 | -1202.128538 | -1202.197131 |
| TS56-SSR       | -1203.541388 | 0.401334 | -1203.116358 | 0.069864 | 0.067960 | -1203.186221 | -1203.184318 | -356.56 | -1202.553696 | 0.425030 | -1202.128666 | -1202.196626 |
| TS56-SSS       | -1203.536102 | 0.400762 | -1203.111670 | 0.069450 | 0.067845 | -1203.181120 | -1203.179515 | -364.73 | -1202.550965 | 0.424432 | -1202.126533 | -1202.194378 |
| TS67-base-SSR  | -1203.043429 | 0.389685 | -1202.630961 | 0.068764 | 0.066508 | -1202.699724 | -1202.697468 | -316.41 | -1202.110329 | 0.412468 | -1201.697861 | -1201.764369 |
| TS67-neu-RRR   | -1203.571608 | 0.403639 | -1203.145170 | 0.067874 | 0.066073 | -1203.213044 | -1203.211243 | -66.97  | -1202.597968 | 0.426438 | -1202.171530 | -1202.237603 |
| TS67-neu-RRS   | -1203.574696 | 0.403429 | -1203.148491 | 0.067822 | 0.066145 | -1203.216314 | -1203.214636 | -312.57 | -1202.598908 | 0.426205 | -1202.172703 | -1202.238848 |
| TS67-neu-SSR   | -1203.562614 | 0.403707 | -1203.136094 | 0.068590 | 0.066380 | -1203.204684 | -1203.202474 | -71.44  | -1202.599898 | 0.426520 | -1202.173378 | -1202.239758 |

|   |           |           |           |   |           |           |           |
|---|-----------|-----------|-----------|---|-----------|-----------|-----------|
| I |           |           |           | H | -0.717923 | 2.503141  | 1.127264  |
|   |           |           |           | H | 0.885776  | 2.585084  | 1.894967  |
| C | 0.281756  | -0.295887 | 1.975883  | H | 0.291863  | 3.936147  | 0.910788  |
| C | 2.368314  | 2.650517  | -0.480235 | H | 0.479931  | 2.388486  | -2.424868 |
| C | -0.825978 | -0.660208 | 1.014105  | H | -0.924850 | 2.650302  | -1.382033 |
| C | 3.093043  | 3.448568  | 0.304527  | H | 0.325330  | 3.899303  | -1.509084 |
| C | -2.800111 | -0.288629 | -0.841758 | H | 1.012502  | 0.096273  | -2.238365 |
| C | -1.410050 | 0.082925  | -1.235390 | H | 3.140782  | 0.974818  | 1.204096  |
| C | -3.869661 | -0.439405 | -1.626720 |   |           |           |           |
| N | -3.144529 | -0.376452 | 0.523382  | 2 |           |           |           |
| N | -0.573281 | 0.198660  | -0.161453 |   |           |           |           |
| C | -2.248322 | -0.516242 | 1.533205  | C | -0.413072 | -0.225681 | 1.441515  |
| O | -2.553830 | -0.598096 | 2.710461  | C | -1.909973 | -2.581445 | -0.640618 |
| C | -4.603585 | -0.436867 | 0.666905  | C | 0.729399  | -0.316955 | 0.418872  |
| C | -5.093705 | -0.707211 | -0.779135 | C | -1.544776 | -3.690334 | 0.005583  |
| O | -1.115997 | 0.321151  | -2.399689 | C | 3.367270  | -1.007693 | -0.368026 |
| C | 0.834027  | 0.680610  | -0.242771 | C | 2.329831  | -2.071380 | -0.367407 |
| C | 2.052930  | -1.156352 | -0.963200 | C | 4.617348  | -1.050742 | -0.832730 |
| C | 2.064483  | -1.264744 | 0.429135  | N | 3.096959  | 0.213120  | 0.281219  |
| C | 2.557071  | -2.181246 | -1.762913 | N | 1.166759  | -1.700629 | 0.240641  |
| C | 2.604094  | -2.379725 | 1.053484  | C | 1.910764  | 0.581005  | 0.818661  |
| C | 3.084035  | -3.306761 | -1.128578 | O | 1.780189  | 1.581749  | 1.505880  |
| C | 3.117395  | -3.412457 | 0.264790  | C | 4.340956  | 0.980293  | 0.424019  |
| C | 0.919240  | 2.241571  | -0.269471 | C | 5.313994  | 0.260208  | -0.542068 |
| C | 0.314623  | 2.845901  | 1.002172  | O | 2.535238  | -3.189737 | -0.809436 |
| C | 0.150702  | 2.819745  | -1.476372 | C | -2.369678 | -0.196875 | -0.250016 |
| N | 1.539042  | 0.078639  | -1.369986 | C | -1.770593 | 1.754535  | -1.049001 |
| C | 1.463382  | -0.017863 | 1.046346  | C | -1.343042 | 1.840601  | 0.277496  |
| O | 2.402426  | 0.728863  | 1.777940  | C | -1.611850 | 2.808082  | -1.935800 |
| H | 0.030594  | 0.603850  | 2.542088  | C | -0.752816 | 2.994118  | 0.764143  |
| H | 0.497872  | -1.100279 | 2.680805  | C | -1.015420 | 3.975747  | -1.447090 |
| H | 2.805560  | 2.282842  | -1.407246 | C | -0.596823 | 4.071050  | -0.118570 |
| H | -0.715247 | -1.715821 | 0.715787  | C | -2.982818 | -1.592826 | -0.213361 |
| H | 4.101526  | 3.734438  | 0.022109  | C | -4.101184 | -1.672878 | -1.272325 |
| H | 2.715170  | 3.838522  | 1.245297  | C | -3.574169 | -1.930754 | 1.159742  |
| H | -3.844357 | -0.377311 | -2.706129 | N | -2.388390 | 0.501693  | -1.327985 |
| H | -4.867233 | -1.217675 | 1.382227  | C | -1.663650 | 0.517153  | 0.939377  |
| H | -4.971678 | 0.519832  | 1.050840  | O | -2.501139 | 0.649774  | 2.077180  |
| H | -5.433181 | -1.741702 | -0.908776 | H | -0.704506 | -1.230187 | 1.763067  |
| H | -5.931308 | -0.058381 | -1.046951 | H | -0.069016 | 0.322394  | 2.323086  |
| H | 2.544293  | -2.102542 | -2.845407 | H | -1.451196 | -2.350131 | -1.604274 |
| H | 2.625163  | -2.445024 | 2.138431  | H | 0.384736  | 0.087423  | -0.548838 |
| H | 3.479604  | -4.116451 | -1.734327 | H | -0.802097 | -4.360593 | -0.418918 |
| H | 3.538308  | -4.296567 | 0.731148  | H | -1.970904 | -3.969667 | 0.964769  |

|                   |           |           |           |                  |           |           |           |
|-------------------|-----------|-----------|-----------|------------------|-----------|-----------|-----------|
| H                 | 5.044786  | -1.900766 | -1.346523 | N                | 1.521772  | -0.590814 | -0.717198 |
| H                 | 0.429221  | -2.396280 | 0.193145  | C                | 2.504497  | 0.545210  | 1.012104  |
| H                 | 4.157591  | 2.026954  | 0.177568  | O                | 2.784406  | 1.418242  | 1.948614  |
| H                 | 4.678646  | 0.925728  | 1.464404  | H                | 0.116927  | 1.272974  | 1.730027  |
| H                 | 5.462810  | 0.830619  | -1.466669 | H                | 0.085866  | -0.461520 | 1.482556  |
| H                 | 6.298277  | 0.116939  | -0.089500 | H                | 0.739440  | 0.809717  | -2.663661 |
| H                 | -1.946959 | 2.721371  | -2.963980 | H                | -1.350158 | 1.504068  | -0.374712 |
| H                 | -0.395709 | 3.052985  | 1.787073  | H                | -0.907587 | 2.345927  | -3.479479 |
| H                 | -0.877123 | 4.823101  | -2.111463 | H                | -0.651455 | 3.483509  | -2.048157 |
| H                 | -0.134382 | 4.987519  | 0.233093  | H                | -6.079066 | -0.785999 | 0.962286  |
| H                 | -4.880858 | -0.936942 | -1.053745 | H                | -2.051156 | 1.723805  | 2.043203  |
| H                 | -3.714631 | -1.465213 | -2.271231 | H                | -3.501047 | -1.818174 | -2.225662 |
| H                 | -4.540073 | -2.674548 | -1.255926 | H                | -3.136209 | -2.977012 | -0.939126 |
| H                 | -2.832060 | -1.915212 | 1.961086  | H                | -5.802344 | -1.767349 | -1.556936 |
| H                 | -4.352882 | -1.211684 | 1.424495  | H                | -5.453520 | -3.032609 | -0.386680 |
| H                 | -4.028107 | -2.925632 | 1.120077  | H                | 2.573544  | -3.073955 | -1.531184 |
| H                 | -3.155345 | 1.336880  | 1.898710  | H                | 4.947667  | -0.550210 | 2.149964  |
| 2-shift-acid-prod |           |           |           | H                | 4.617381  | -3.954117 | -0.467188 |
| C                 | 0.043128  | 0.498907  | 0.955686  | H                | 5.806035  | -2.739190 | 1.322021  |
| C                 | 0.526539  | 1.707672  | -2.086893 | H                | 3.563926  | 2.264513  | -0.587601 |
| C                 | -1.362586 | 0.668057  | 0.335090  | H                | 3.178276  | 1.118911  | -1.894161 |
| C                 | -0.386828 | 2.558112  | -2.551970 | H                | 2.898906  | 2.848027  | -2.119461 |
| C                 | -4.016075 | -0.441488 | 0.539667  | H                | 0.033428  | 3.171771  | 0.313953  |
| C                 | -3.609832 | 0.597581  | 1.508956  | H                | 1.760029  | 3.421334  | 0.690311  |
| C                 | -5.202110 | -1.025359 | 0.375342  | H                | 1.101157  | 4.034261  | -0.791776 |
| N                 | -3.053059 | -0.957455 | -0.359363 | H                | 0.706963  | -0.977032 | -1.212683 |
| N                 | -2.280181 | 0.946056  | 1.433976  | H                | 2.133089  | 2.132649  | 2.008584  |
| C                 | -1.795665 | -0.538266 | -0.502929 | 2-shift-acid-sub |           |           |           |
| O                 | -1.026204 | -1.056129 | -1.322376 | C                | -0.038006 | -0.648709 | 1.146720  |
| C                 | -3.649409 | -2.039880 | -1.167425 | C                | 1.716054  | 3.254429  | -0.678371 |
| C                 | -5.136897 | -2.045424 | -0.733682 | C                | -0.733141 | -0.916083 | -0.200795 |
| O                 | -4.365580 | 1.075659  | 2.327987  | C                | 0.723107  | 3.631163  | -1.485261 |
| C                 | 1.315132  | 0.619726  | 0.068636  | C                | -3.321741 | 0.285810  | -0.411102 |
| C                 | 2.585848  | -1.275984 | -0.293704 | C                | -2.164204 | 1.009584  | -0.974414 |
| C                 | 3.260716  | -0.578317 | 0.761542  | C                | -4.584550 | 0.699587  | -0.291643 |
| C                 | 3.076802  | -2.526925 | -0.742504 | N                | -3.168027 | -1.053514 | 0.007568  |
| C                 | 4.447410  | -1.100342 | 1.360467  | N                | -0.990940 | 0.298727  | -0.960222 |
| C                 | 4.214729  | -2.999952 | -0.140619 | C                | -2.003186 | -1.713831 | 0.134363  |
| C                 | 4.909449  | -2.297896 | 0.903030  | O                | -1.900215 | -2.855989 | 0.552642  |
| C                 | 1.410180  | 1.906472  | -0.865065 | C                | -4.479131 | -1.618794 | 0.376430  |
| C                 | 2.855529  | 2.035114  | -1.391013 | C                | -5.440392 | -0.405785 | 0.277135  |
| C                 | 1.044309  | 3.186152  | -0.104741 | O                | -2.239481 | 2.130918  | -1.447669 |



|                       |           |           |           |                      |           |           |           |
|-----------------------|-----------|-----------|-----------|----------------------|-----------|-----------|-----------|
| H                     | 1.804660  | 4.381680  | 0.247191  | H                    | 4.855007  | -0.542160 | -1.866000 |
| H                     | 0.512849  | -0.240686 | -1.691178 | H                    | 1.711346  | -3.042236 | 1.109523  |
| 2-shift-base-acid-sub |           |           |           | H                    | 5.013788  | -3.009484 | -1.639366 |
| C                     | 0.026932  | -0.437404 | 1.479010  | H                    | 3.454300  | -4.253795 | -0.181437 |
| C                     | -0.049686 | 2.349266  | -0.611786 | H                    | 2.961199  | 3.722061  | 0.311264  |
| C                     | -0.747958 | -1.343297 | 0.497150  | H                    | 2.316911  | 3.348573  | -1.313112 |
| C                     | -1.314562 | 2.711555  | -0.399245 | H                    | 1.532851  | 4.568615  | -0.307734 |
| C                     | -3.009888 | -0.294652 | -0.931658 | H                    | -0.007534 | 2.388697  | 2.228740  |
| C                     | -1.677988 | -0.257775 | -1.585359 | H                    | 1.557824  | 3.183125  | 2.360447  |
| C                     | -4.170903 | 0.185385  | -1.379245 | H                    | 0.195189  | 4.035331  | 1.607300  |
| N                     | -3.152570 | -0.923937 | 0.318171  | 2-shift-neutral-prod |           |           |           |
| N                     | -0.690113 | -0.865585 | -0.878401 | C                    | -0.030538 | 1.071550  | -0.476090 |
| C                     | -2.164914 | -1.496131 | 1.041116  | C                    | -1.858493 | 2.635647  | 1.461313  |
| O                     | -2.362395 | -2.066248 | 2.103915  | C                    | 0.955055  | -0.089008 | -0.275718 |
| C                     | -4.568035 | -0.945192 | 0.714288  | C                    | -1.356267 | 3.860163  | 1.617794  |
| C                     | -5.264004 | -0.081195 | -0.369722 | C                    | 3.688549  | -0.291289 | 0.616963  |
| O                     | -1.505730 | 0.256877  | -2.679728 | C                    | 2.602277  | -0.351256 | 1.629981  |
| C                     | 1.872795  | 1.217023  | 0.468014  | C                    | 5.004228  | -0.408968 | 0.796481  |
| C                     | 3.167340  | -0.419699 | -0.519916 | N                    | 3.364661  | -0.063883 | -0.733720 |
| C                     | 2.280911  | -1.117785 | 0.315013  | N                    | 1.354211  | -0.194515 | 1.123242  |
| C                     | 4.166622  | -1.083298 | -1.224547 | C                    | 2.123963  | 0.059061  | -1.250464 |
| C                     | 2.372039  | -2.497742 | 0.440367  | O                    | 1.922316  | 0.243056  | -2.443669 |
| C                     | 4.246631  | -2.470503 | -1.092215 | C                    | 4.587139  | -0.012105 | -1.548338 |
| C                     | 3.362699  | -3.177189 | -0.273967 | C                    | 5.725506  | -0.261170 | -0.523498 |
| C                     | 1.110953  | 2.547811  | 0.340621  | O                    | 2.839677  | -0.508218 | 2.817930  |
| C                     | 2.048177  | 3.605178  | -0.284785 | C                    | -1.490235 | 0.712462  | -0.094306 |
| C                     | 0.682983  | 3.062756  | 1.718024  | C                    | -1.996431 | -1.279741 | 0.750870  |
| N                     | 2.855199  | 0.942476  | -0.539785 | C                    | -2.373503 | -1.385971 | -0.660666 |
| C                     | 1.410104  | -0.102537 | 0.984664  | C                    | -2.184530 | -2.440704 | 1.596848  |
| O                     | 2.208549  | 0.788083  | 1.787916  | C                    | -2.917550 | -2.605108 | -1.195208 |
| H                     | -0.539858 | 0.485540  | 1.629572  | C                    | -2.698556 | -3.567612 | 1.045202  |
| H                     | 0.088013  | -0.956194 | 2.441650  | C                    | -3.072421 | -3.659923 | -0.357061 |
| H                     | 0.207721  | 1.886850  | -1.566949 | C                    | -2.343781 | 2.020809  | 0.163045  |
| H                     | -0.320607 | -2.349635 | 0.519766  | C                    | -3.820182 | 1.630049  | 0.353954  |
| H                     | -2.064749 | 2.548471  | -1.166840 | C                    | -2.233979 | 2.999583  | -1.010285 |
| H                     | -1.640665 | 3.174510  | 0.528118  | N                    | -1.507887 | -0.127504 | 1.104222  |
| H                     | -4.288809 | 0.700730  | -2.322812 | C                    | -2.069985 | -0.164363 | -1.182056 |
| H                     | 0.222681  | -0.848859 | -1.323091 | O                    | -2.174788 | 0.289798  | -2.434168 |
| H                     | -4.922290 | -1.980012 | 0.720211  | H                    | 0.297236  | 1.912718  | 0.143842  |
| H                     | -4.668995 | -0.548419 | 1.726138  | H                    | -0.006241 | 1.370933  | -1.527573 |
| H                     | -6.114924 | -0.603200 | -0.816086 | H                    | -1.960354 | 1.987955  | 2.329552  |
| H                     | -5.646656 | 0.857461  | 0.046080  |                      |           |           |           |

|                     |           |           |           |              |           |           |           |
|---------------------|-----------|-----------|-----------|--------------|-----------|-----------|-----------|
| H                   | 0.465952  | -1.027038 | -0.582727 | C            | 1.159999  | 2.596895  | 0.308299  |
| H                   | -1.062171 | 4.212873  | 2.601101  | C            | 2.013807  | 3.618219  | -0.466297 |
| H                   | -1.219621 | 4.549943  | 0.790126  | C            | 1.117323  | 2.999601  | 1.786607  |
| H                   | 5.468245  | -0.581779 | 1.757717  | N            | 2.433697  | 0.914350  | -0.941211 |
| H                   | 0.583191  | -0.220115 | 1.786645  | C            | 1.584998  | 0.017759  | 1.088305  |
| H                   | 4.531907  | -0.774783 | -2.328835 | O            | 2.184966  | 0.408366  | 2.319092  |
| H                   | 4.654281  | 0.962957  | -2.037138 | H            | -0.472306 | 0.461439  | 1.600447  |
| H                   | 6.299199  | -1.161013 | -0.767712 | H            | 0.146645  | -1.070812 | 2.232307  |
| H                   | 6.434922  | 0.571913  | -0.499917 | H            | -0.219284 | 2.356485  | -1.399776 |
| H                   | -1.908423 | -2.381800 | 2.644440  | H            | -0.002994 | -2.147797 | 0.066725  |
| H                   | -3.201420 | -2.682633 | -2.241974 | H            | -2.302849 | 2.846994  | -0.306646 |
| H                   | -2.843223 | -4.447037 | 1.665860  | H            | -1.451659 | 3.086514  | 1.324941  |
| H                   | -3.481122 | -4.595466 | -0.723340 | H            | -4.492729 | 0.923549  | -1.903101 |
| H                   | -4.244775 | 1.234944  | -0.575243 | H            | 0.198155  | -0.342605 | -1.547491 |
| H                   | -3.929251 | 0.876048  | 1.139057  | H            | -4.643951 | -2.377823 | 0.496981  |
| H                   | -4.397839 | 2.512731  | 0.642979  | H            | -4.436998 | -1.198035 | 1.798490  |
| H                   | -1.210509 | 3.351265  | -1.165703 | H            | -6.080929 | -0.811737 | -0.579349 |
| H                   | -2.581979 | 2.542199  | -1.938081 | H            | -5.635626 | 0.465756  | 0.546311  |
| H                   | -2.860637 | 3.873482  | -0.806131 | H            | 3.931444  | -0.690337 | -2.671020 |
| H                   | -2.443498 | -0.416704 | -3.036458 | H            | 2.324286  | -2.820947 | 1.565970  |
|                     |           |           |           | H            | 4.488684  | -3.075807 | -2.144729 |
| 2-shift-neutral-sub |           |           |           | H            | 3.703904  | -4.113788 | -0.050830 |
|                     |           |           |           | H            | 3.039609  | 3.620468  | -0.085750 |
| C                   | 0.129846  | -0.418433 | 1.350974  | H            | 2.047084  | 3.377166  | -1.529961 |
| C                   | -0.219681 | 2.586824  | -0.333273 | H            | 1.582267  | 4.614974  | -0.337610 |
| C                   | -0.564504 | -1.223379 | 0.235142  | H            | 0.514595  | 2.322445  | 2.396426  |
| C                   | -1.379883 | 2.852995  | 0.266045  | H            | 2.124715  | 3.005963  | 2.208159  |
| C                   | -3.022948 | -0.200427 | -0.836222 | H            | 0.696371  | 4.006557  | 1.865466  |
| C                   | -1.760855 | 0.085509  | -1.561956 | H            | 2.463970  | -0.387202 | 2.788935  |
| C                   | -4.253245 | 0.243902  | -1.096652 |              |           |           |           |
| N                   | -3.008467 | -1.082504 | 0.259579  | 2-shift-prod |           |           |           |
| N                   | -0.661779 | -0.520772 | -1.038658 |              |           |           |           |
| C                   | -1.915231 | -1.664403 | 0.797283  | C            | -0.041507 | 1.182334  | -0.464036 |
| O                   | -1.971420 | -2.456922 | 1.726742  | C            | -1.871451 | 2.494978  | 1.634238  |
| C                   | -4.381328 | -1.338983 | 0.717681  | C            | 0.992497  | 0.050080  | -0.416693 |
| C                   | -5.230295 | -0.326091 | -0.093599 | C            | -1.519608 | 3.751597  | 1.914500  |
| O                   | -1.733316 | 0.782911  | -2.563904 | C            | 3.636948  | -0.457192 | 0.598298  |
| C                   | 1.749200  | 1.207520  | 0.106047  | C            | 2.472106  | -0.637625 | 1.513606  |
| C                   | 2.836391  | -0.445903 | -0.834763 | C            | 4.929048  | -0.702101 | 0.826849  |
| C                   | 2.387677  | -1.031412 | 0.351252  | N            | 3.426844  | 0.066472  | -0.686140 |
| C                   | 3.592151  | -1.159192 | -1.753441 | N            | 1.288113  | -0.304084 | 0.972633  |
| C                   | 2.684905  | -2.349431 | 0.653631  | C            | 2.230869  | 0.417366  | -1.229733 |
| C                   | 3.898011  | -2.489971 | -1.447742 | O            | 2.165938  | 0.945514  | -2.330421 |
| C                   | 3.455594  | -3.078895 | -0.262036 | C            | 4.711975  | 0.308985  | -1.347864 |

|             |           |           |           |   |           |           |           |
|-------------|-----------|-----------|-----------|---|-----------|-----------|-----------|
| C           | 5.741497  | -0.367378 | -0.405645 | C | 2.979929  | -0.186540 | 0.802949  |
| O           | 2.639520  | -1.027132 | 2.666002  | C | 1.718997  | 0.089366  | 1.543550  |
| C           | -1.461872 | 0.717260  | -0.073380 | C | 4.208212  | 0.280128  | 1.041564  |
| C           | -1.973833 | -1.364190 | 0.589306  | N | 2.962697  | -1.078322 | -0.278014 |
| C           | -2.401333 | -1.354134 | -0.779622 | N | 0.628953  | -0.522961 | 1.034368  |
| C           | -2.153811 | -2.586937 | 1.320209  | C | 1.868808  | -1.740664 | -0.744689 |
| C           | -2.979176 | -2.469111 | -1.399049 | O | 1.967298  | -2.629738 | -1.578885 |
| C           | -2.724183 | -3.666744 | 0.687490  | C | 4.334052  | -1.367309 | -0.703936 |
| C           | -3.148907 | -3.633450 | -0.671857 | C | 5.167719  | -0.273102 | 0.009204  |
| C           | -2.355032 | 1.964952  | 0.301404  | O | 1.716487  | 0.789410  | 2.550719  |
| C           | -3.809808 | 1.495642  | 0.498574  | C | -1.725470 | 1.201140  | -0.137308 |
| C           | -2.325371 | 3.038642  | -0.790869 | C | -2.769515 | -0.458712 | 0.824518  |
| N           | -1.439632 | -0.235290 | 1.043186  | C | -2.408328 | -1.007053 | -0.409110 |
| C           | -2.082002 | -0.042578 | -1.286793 | C | -3.476730 | -1.190814 | 1.771295  |
| O           | -2.225099 | 0.421080  | -2.417612 | C | -2.775401 | -2.302126 | -0.731526 |
| H           | 0.296851  | 1.976902  | 0.213478  | C | -3.833572 | -2.505551 | 1.448919  |
| H           | -0.066684 | 1.575507  | -1.485172 | C | -3.493767 | -3.054001 | 0.209222  |
| H           | -1.829432 | 1.736876  | 2.414889  | C | -1.166304 | 2.607917  | -0.328968 |
| H           | 0.563804  | -0.829942 | -0.924988 | C | -2.074004 | 3.618781  | 0.398395  |
| H           | -1.202062 | 4.027990  | 2.915992  | C | -1.067909 | 2.999455  | -1.806668 |
| H           | -1.526943 | 4.540567  | 1.167168  | N | -2.358515 | 0.900706  | 0.948554  |
| H           | 5.310386  | -1.105946 | 1.754129  | C | -1.634896 | 0.056929  | -1.205031 |
| H           | 0.419258  | -0.411732 | 1.520186  | O | -2.149206 | 0.397258  | -2.386963 |
| H           | 4.691018  | -0.108654 | -2.356444 | H | 0.489730  | 0.437885  | -1.607406 |
| H           | 4.872253  | 1.388893  | -1.435980 | H | -0.177451 | -1.073151 | -2.255239 |
| H           | 6.163091  | -1.274263 | -0.856310 | H | 0.140109  | 2.402916  | 1.438065  |
| H           | 6.580968  | 0.299203  | -0.185293 | H | -0.077560 | -2.141999 | -0.055699 |
| H           | -1.836412 | -2.639984 | 2.357961  | H | 2.266237  | 2.893068  | 0.431761  |
| H           | -3.281202 | -2.400178 | -2.442212 | H | 1.477612  | 3.116462  | -1.237267 |
| H           | -2.856518 | -4.590447 | 1.248441  | H | 4.447030  | 0.979400  | 1.830606  |
| H           | -3.593450 | -4.515478 | -1.121633 | H | -0.246414 | -0.284704 | 1.492861  |
| H           | -4.236934 | 1.160164  | -0.452601 | H | 4.608201  | -2.375730 | -0.372707 |
| H           | -3.850835 | 0.668252  | 1.213275  | H | 4.396922  | -1.340009 | -1.792974 |
| H           | -4.418763 | 2.323042  | 0.879355  | H | 6.077866  | -0.686350 | 0.453397  |
| H           | -1.331094 | 3.483182  | -0.901039 | H | 5.477451  | 0.512953  | -0.691080 |
| H           | -2.613265 | 2.605317  | -1.751132 | H | -3.745581 | -0.743858 | 2.724409  |
| H           | -3.026469 | 3.842974  | -0.537184 | H | -2.516073 | -2.716188 | -1.703542 |
|             |           |           |           | H | -4.388746 | -3.103552 | 2.166771  |
| 2-shift-sub |           |           |           | H | -3.792863 | -4.072276 | -0.025672 |
|             |           |           |           | H | -3.079742 | 3.589747  | -0.032629 |
| C           | -0.137806 | -0.429839 | -1.369610 | H | -2.153502 | 3.378761  | 1.460659  |
| C           | 0.181039  | 2.633680  | 0.371850  | H | -1.662912 | 4.627839  | 0.281947  |
| C           | 0.523694  | -1.245911 | -0.238930 | H | -0.442413 | 2.312990  | -2.379937 |
| C           | 1.366504  | 2.901580  | -0.177783 | H | -2.054598 | 2.952806  | -2.269993 |



|   |           |           |           |   |           |           |           |
|---|-----------|-----------|-----------|---|-----------|-----------|-----------|
| H | -0.663402 | 4.017471  | -1.877100 | H | 0.994643  | 3.289570  | 1.077693  |
|   |           |           |           | H | 2.834027  | 2.221695  | -2.670353 |
| 3 |           |           |           | H | 2.777437  | 3.650708  | -0.656246 |
|   |           |           |           | H | -3.000544 | 2.495354  | -0.231505 |
| C | -1.513034 | -1.259939 | 0.945004  | H | -2.594822 | 1.744431  | -1.794335 |
| C | -3.649434 | -0.722244 | -1.235631 | H | -4.285192 | 1.861155  | -1.273062 |
| C | -0.084238 | -1.707771 | 1.299180  | H | -4.113151 | -0.641320 | 1.498165  |
| C | -4.633681 | -1.603906 | -1.062614 | H | -3.627812 | 1.044447  | 1.753174  |
| C | 2.520147  | -0.605926 | 0.711879  | H | -5.047240 | 0.659616  | 0.757904  |
| C | 1.808881  | -0.132716 | 1.922563  | H | -0.768866 | -0.961521 | -1.616877 |
| C | 3.678894  | -0.182793 | 0.208617  |   |           |           |           |
| N | 1.936999  | -1.609446 | -0.088679 | 4 |           |           |           |
| N | 0.605510  | -0.733851 | 2.137852  |   |           |           |           |
| C | 0.699574  | -2.119843 | 0.053181  | C | 0.859080  | 3.072125  | -1.249493 |
| O | 0.207493  | -2.899575 | -0.757697 | C | 0.231466  | 1.938152  | -1.752151 |
| C | 2.799193  | -1.895793 | -1.244706 | C | -0.596750 | 1.212532  | -0.883224 |
| C | 3.984972  | -0.910680 | -1.078064 | C | -0.750909 | 1.625047  | 0.448391  |
| O | 2.266820  | 0.729373  | 2.653228  | C | -0.122888 | 2.768202  | 0.940005  |
| C | -1.654090 | 0.010386  | 0.087189  | C | 0.686908  | 3.499613  | 0.080193  |
| C | 0.138839  | 0.856411  | -1.168439 | H | 1.501061  | 3.650643  | -1.908205 |
| C | 0.096658  | 1.684852  | -0.036131 | H | 0.368585  | 1.622961  | -2.781933 |
| C | 1.132094  | 1.042830  | -2.139500 | H | -0.262426 | 3.054834  | 1.978263  |
| C | 1.038006  | 2.692804  | 0.171807  | H | 1.193628  | 4.393046  | 0.428010  |
| C | 2.058774  | 2.057438  | -1.926405 | C | -1.550544 | 0.604291  | 1.133689  |
| C | 2.026968  | 2.878929  | -0.785296 | C | -1.818851 | -0.517259 | 0.090413  |
| C | -3.170263 | 0.315742  | -0.240557 | N | -1.324250 | 0.074845  | -1.159604 |
| C | -3.261216 | 1.691822  | -0.928041 | H | -0.923236 | -0.570039 | -1.835590 |
| C | -4.034584 | 0.340675  | 1.024090  | O | -1.904427 | 0.574629  | 2.294982  |
| N | -0.885832 | -0.064290 | -1.161351 | C | -3.341691 | -0.869020 | -0.034008 |
| C | -1.000258 | 1.215394  | 0.815773  | C | -3.575837 | -1.709517 | -1.293698 |
| O | -1.353035 | 1.638062  | 1.899646  | H | -3.041629 | -2.662815 | -1.235502 |
| H | -2.009709 | -2.094956 | 0.439695  | H | -4.642958 | -1.932589 | -1.390477 |
| H | -2.038298 | -1.080366 | 1.888809  | H | -3.251181 | -1.189949 | -2.198084 |
| H | -3.134916 | -0.699189 | -2.196458 | C | -3.835106 | -1.657878 | 1.191838  |
| H | -0.192307 | -2.643623 | 1.865274  | H | -3.598630 | -1.136197 | 2.122465  |
| H | -4.908903 | -2.288489 | -1.858463 | H | -4.920719 | -1.778800 | 1.123520  |
| H | -5.200584 | -1.673548 | -0.139162 | H | -3.391575 | -2.657997 | 1.224295  |
| H | 4.283417  | 0.592513  | 0.659304  | C | -4.107381 | 0.440802  | -0.081244 |
| H | 0.086013  | -0.340784 | 2.916107  | H | -4.179165 | 0.957265  | 0.876830  |
| H | 3.105497  | -2.944393 | -1.216177 | C | -4.673607 | 0.994824  | -1.151608 |
| H | 2.229435  | -1.737822 | -2.164028 | H | -5.196956 | 1.942429  | -1.073352 |
| H | 4.943225  | -1.436591 | -1.029690 | H | -4.635803 | 0.534567  | -2.134119 |
| H | 4.043362  | -0.207403 | -1.916176 | C | -0.941493 | -1.735468 | 0.502176  |
| H | 1.165112  | 0.426708  | -3.033153 | H | -1.221584 | -2.038603 | 1.513334  |

|       |           |           |           |   |           |           |           |
|-------|-----------|-----------|-----------|---|-----------|-----------|-----------|
| H     | -1.113457 | -2.559527 | -0.197490 | C | -3.863710 | 1.488255  | -0.242722 |
| C     | 0.518699  | -1.376729 | 0.507363  | C | -4.074876 | -0.450774 | 1.322132  |
| C     | 1.251219  | -1.412126 | -0.763177 | N | -1.295086 | 0.349545  | -1.232873 |
| C     | 2.337208  | -0.523713 | 1.648627  | C | -1.259012 | 1.007584  | 1.041488  |
| C     | 3.100007  | -0.491242 | 0.520589  | O | -1.506178 | 1.068135  | 2.232284  |
| N     | 1.064829  | -0.971436 | 1.623622  | H | -1.693487 | -2.178217 | -0.191419 |
| N     | 2.540505  | -0.964044 | -0.637820 | H | -1.728167 | -1.640102 | 1.507555  |
| O     | 2.838436  | -0.087319 | 2.832174  | H | -3.544514 | -0.430586 | -2.140354 |
| O     | 0.793248  | -1.782126 | -1.854058 | H | -4.954851 | -2.382350 | -2.066107 |
| C     | 3.446854  | -0.832366 | -1.783635 | H | -5.069510 | -2.289732 | -0.222832 |
| H     | 3.136426  | 0.040245  | -2.370066 | H | 4.923042  | -1.406588 | 0.738770  |
| H     | 3.362597  | -1.717913 | -2.414430 | H | 4.603348  | 0.311917  | 0.967682  |
| C     | 4.486546  | 0.010250  | 0.249589  | H | 3.420569  | -2.250093 | -1.900433 |
| H     | 4.468565  | 1.104704  | 0.176253  | H | 2.615223  | -0.789299 | -2.493390 |
| H     | 5.184331  | -0.257887 | 1.044893  | H | 5.282606  | -0.690083 | -1.575578 |
| C     | 4.813099  | -0.645109 | -1.109081 | H | 4.163310  | 0.669041  | -1.371044 |
| H     | 5.492158  | -0.045455 | -1.716519 | H | 0.706663  | 1.270969  | -2.965619 |
| H     | 5.274552  | -1.622826 | -0.944052 | H | 0.732360  | 2.987990  | 1.745073  |
| H     | 2.115611  | -0.119576 | 3.474475  | H | 2.433784  | 2.889205  | -2.213571 |
|       |           |           |           | H | 2.465065  | 3.759476  | 0.099846  |
| 4-zwi |           |           |           | H | -3.364712 | 1.887661  | -1.130616 |
|       |           |           |           | H | -4.944807 | 1.538932  | -0.400946 |
| C     | -1.336238 | -1.417791 | 0.510538  | H | -3.615659 | 2.118482  | 0.617867  |
| C     | -3.893996 | -0.798396 | -1.175570 | H | -3.893850 | -1.512946 | 1.510056  |
| C     | 0.160383  | -1.418275 | 0.537134  | H | -3.686126 | 0.120423  | 2.167572  |
| C     | -4.676001 | -1.877158 | -1.146982 | H | -5.158589 | -0.306260 | 1.271287  |
| C     | 2.858795  | -0.887283 | 0.639784  | H | -1.063919 | -0.428472 | -1.850676 |
| C     | 2.146563  | -0.805206 | 1.877173  | H | 0.226242  | -0.904624 | 2.518848  |
| C     | 4.297621  | -0.570234 | 0.400777  |   |           |           |           |
| N     | 2.247076  | -1.250665 | -0.489423 | 5 |           |           |           |
| N     | 0.794232  | -1.070241 | 1.688344  |   |           |           |           |
| C     | 0.897372  | -1.573706 | -0.659236 | C | -0.411447 | -0.515789 | -1.222099 |
| O     | 0.457078  | -1.872870 | -1.793215 | C | 1.946573  | 0.122553  | 0.560443  |
| C     | 3.156260  | -1.218104 | -1.648761 | C | 1.521805  | 0.997565  | -0.644661 |
| C     | 4.335410  | -0.383972 | -1.130047 | C | 0.793766  | 0.194434  | -1.760601 |
| O     | 2.623233  | -0.515228 | 2.976865  | H | 1.484592  | -0.517555 | -2.218204 |
| C     | -1.879369 | -0.025680 | 0.065655  | C | 0.347111  | 1.383761  | 1.340269  |
| C     | -0.265182 | 1.246477  | -1.027143 | C | -0.607453 | 1.901266  | 2.202733  |
| C     | -0.243317 | 1.741225  | 0.284881  | C | -1.396664 | 2.957946  | 1.733355  |
| C     | 0.709339  | 1.654827  | -1.950262 | C | -1.229176 | 3.466132  | 0.443912  |
| C     | 0.730060  | 2.646128  | 0.714310  | C | -0.273320 | 2.921693  | -0.424091 |
| C     | 1.671535  | 2.557146  | -1.513431 | C | 0.510669  | 1.885206  | 0.045614  |
| C     | 1.692304  | 3.059045  | -0.196971 | H | -0.723360 | 1.498718  | 3.203674  |
| C     | -3.442377 | 0.028306  | 0.011952  | H | -2.148226 | 3.393835  | 2.384801  |

|              |           |           |           |   |           |           |           |
|--------------|-----------|-----------|-----------|---|-----------|-----------|-----------|
| H            | -1.854098 | 4.285848  | 0.104562  | C | -2.781115 | -0.603319 | -0.707826 |
| H            | -0.169256 | 3.289466  | -1.439968 | C | -2.038675 | 0.040614  | -1.635751 |
| N            | 1.266164  | 0.335948  | 1.626344  | C | -4.161912 | -0.371053 | -0.171179 |
| H            | 0.478674  | 0.922719  | -2.512937 | N | -2.197392 | -1.661032 | -0.037322 |
| C            | -1.727428 | 0.098942  | -1.465145 | N | -0.717984 | -0.238203 | -1.803888 |
| C            | -2.549666 | -1.621626 | 0.050278  | C | -0.901976 | -2.086650 | -0.219826 |
| N            | -2.720774 | -0.511025 | -0.735857 | O | -0.471809 | -3.111434 | 0.306713  |
| N            | -0.247957 | -1.590681 | -0.497970 | C | -3.079813 | -2.221384 | 0.980201  |
| C            | -1.304316 | -2.163329 | 0.126377  | C | -4.096564 | -1.088976 | 1.193825  |
| O            | -1.088978 | -3.290652 | 0.856500  | O | -2.560245 | 1.057444  | -2.384504 |
| C            | -3.858037 | -2.004916 | 0.675181  | C | 1.718761  | -0.083176 | 0.042458  |
| H            | -4.311462 | -2.830663 | 0.113334  | C | 0.050028  | 0.979378  | 1.082053  |
| H            | -3.734460 | -2.334959 | 1.708324  | C | 0.418883  | 1.908988  | 0.047938  |
| C            | -4.678077 | -0.705136 | 0.530488  | C | -1.073871 | 1.335624  | 1.909645  |
| H            | -4.502343 | -0.063765 | 1.398838  | C | -0.288346 | 3.093495  | -0.184497 |
| H            | -5.750552 | -0.886893 | 0.448520  | C | -1.756150 | 2.500055  | 1.649615  |
| C            | -4.105111 | -0.029335 | -0.723430 | C | -1.386755 | 3.396798  | 0.603149  |
| H            | -4.602264 | -0.348903 | -1.646105 | C | 3.184194  | -0.267398 | 0.575223  |
| H            | -4.100955 | 1.061330  | -0.695411 | C | 3.243112  | -1.472402 | 1.519142  |
| H            | -0.132647 | -3.408615 | 0.928618  | C | 3.571314  | 0.992950  | 1.373102  |
| O            | 2.592659  | 1.731476  | -1.199525 | N | 0.755571  | -0.135555 | 1.149679  |
| H            | 3.155283  | 1.112561  | -1.687640 | C | 1.521512  | 1.299889  | -0.655904 |
| O            | -1.951212 | 1.050020  | -2.212680 | O | 2.173108  | 1.716354  | -1.614632 |
| C            | 3.156102  | -0.800165 | 0.571058  | H | 1.694076  | -2.161237 | -0.663551 |
| C            | 2.917080  | -1.955906 | 1.556005  | H | 1.806750  | -0.935379 | -1.967701 |
| H            | 3.809665  | -2.586519 | 1.609237  | H | 4.104559  | 0.438666  | -1.290341 |
| H            | 2.682058  | -1.565559 | 2.547729  | H | 5.629971  | -1.402266 | -1.691330 |
| H            | 2.074850  | -2.568845 | 1.220229  | H | 5.037939  | -2.275781 | -0.169634 |
| C            | 4.348306  | 0.043985  | 1.061109  | H | -4.379103 | 0.696694  | -0.090700 |
| H            | 4.519845  | 0.917728  | 0.426064  | H | -3.546539 | -3.140703 | 0.603850  |
| H            | 5.256597  | -0.567059 | 1.083153  | H | -2.486275 | -2.473500 | 1.861363  |
| H            | 4.138824  | 0.400564  | 2.072573  | H | -5.067711 | -1.458106 | 1.531678  |
| C            | 3.398899  | -1.402643 | -0.797019 | H | -3.703756 | -0.393965 | 1.941732  |
| C            | 4.450256  | -1.184753 | -1.589237 | H | -1.370669 | 0.666387  | 2.714124  |
| H            | 2.629283  | -2.105387 | -1.120631 | H | 0.030042  | 3.753773  | -0.990150 |
| H            | 5.254528  | -0.508733 | -1.311332 | H | -2.616118 | 2.754479  | 2.268511  |
| H            | 4.544420  | -1.695064 | -2.542650 | H | -1.962689 | 4.301796  | 0.438160  |
|              |           |           |           | H | 2.956847  | -2.405048 | 1.023063  |
| 5-shift-prod |           |           |           | H | 4.260060  | -1.589994 | 1.912444  |
|              |           |           |           | H | 2.547217  | -1.312648 | 2.344264  |
| C            | 1.350657  | -1.182251 | -1.003947 | H | 3.655223  | 1.866982  | 0.719504  |
| C            | 4.139111  | -0.396587 | -0.590936 | H | 2.805029  | 1.191040  | 2.130499  |
| C            | -0.144951 | -1.172070 | -1.103066 | H | 4.535640  | 0.840415  | 1.871042  |
| C            | 4.978257  | -1.408876 | -0.821920 | H | -4.917467 | -0.825344 | -0.825213 |

|             |           |           |           |       |           |           |           |
|-------------|-----------|-----------|-----------|-------|-----------|-----------|-----------|
| H           | -1.817029 | 1.646459  | -2.580513 | H     | -2.616184 | -3.593908 | -0.441734 |
|             |           |           |           | H     | 2.709208  | 2.422172  | -0.775481 |
| 5-shift-sub |           |           |           | H     | 4.353160  | 2.085827  | -1.372549 |
|             |           |           |           | H     | 2.928305  | 1.532403  | -2.293362 |
| C           | 0.909308  | -0.404796 | 1.778343  | H     | 4.200271  | -1.624030 | -0.729822 |
| C           | 3.872353  | 0.490304  | 0.882223  | H     | 3.922465  | -0.792338 | -2.283624 |
| C           | -0.242638 | 0.430918  | 1.382012  | H     | 5.293084  | -0.298188 | -1.247749 |
| C           | 4.361703  | 1.599340  | 1.439179  | H     | -3.383918 | 2.277939  | -1.716512 |
| C           | -2.319995 | 1.617325  | 0.041029  | H     | 0.201379  | 3.184444  | -0.851785 |
| C           | -1.063991 | 2.121718  | 0.027478  |       |           |           |           |
| C           | -3.581673 | 1.982922  | -0.683267 | 5-zwi |           |           |           |
| N           | -2.556873 | 0.524523  | 0.853992  |       |           |           |           |
| N           | -0.042197 | 1.525195  | 0.690454  | C     | -0.971923 | -0.541051 | 0.669981  |
| C           | -1.608667 | -0.103153 | 1.620499  | C     | 2.775328  | 0.154035  | 0.100327  |
| O           | -1.903268 | -1.009980 | 2.400470  | C     | 1.330304  | -0.121266 | -0.391732 |
| C           | -3.935399 | 0.055175  | 0.758457  | C     | 0.507131  | -0.706315 | 0.808756  |
| C           | -4.405545 | 0.682999  | -0.561946 | H     | 0.840007  | -0.229818 | 1.737885  |
| O           | -0.756171 | 3.227168  | -0.715372 | C     | 1.884440  | 2.138331  | -0.132327 |
| C           | 1.966864  | -0.280837 | -0.546855 | C     | 1.752874  | 3.519300  | -0.126659 |
| C           | 0.063931  | -0.975788 | -1.336830 | C     | 0.580770  | 4.061758  | -0.663350 |
| C           | 0.235813  | -1.790957 | -0.210524 | C     | -0.415052 | 3.239321  | -1.193465 |
| C           | -1.073520 | -1.061115 | -2.131483 | C     | -0.274345 | 1.845294  | -1.179670 |
| C           | -0.714617 | -2.738803 | 0.120602  | C     | 0.880335  | 1.308156  | -0.635599 |
| C           | -2.038429 | -2.018049 | -1.790253 | H     | 2.544594  | 4.146551  | 0.269562  |
| C           | -1.857242 | -2.854228 | -0.684598 | H     | 0.447640  | 5.138847  | -0.680031 |
| C           | 3.342683  | 0.361769  | -0.530500 | H     | -1.305897 | 3.685622  | -1.623676 |
| C           | 3.335768  | 1.686134  | -1.291979 | H     | -1.044681 | 1.207633  | -1.607864 |
| C           | 4.258943  | -0.662713 | -1.249775 | N     | 3.022650  | 1.398822  | 0.295945  |
| N           | 1.162751  | -0.096886 | -1.538826 | H     | 0.742724  | -1.773559 | 0.866807  |
| C           | 1.505156  | -1.316544 | 0.517413  | C     | -1.680531 | -1.242592 | -0.330424 |
| O           | 2.397566  | -2.180074 | 0.947388  | C     | -3.700642 | -0.166980 | 0.524987  |
| H           | 1.741302  | 0.200692  | 2.138293  | N     | -3.048682 | -1.007056 | -0.288109 |
| H           | 0.627513  | -1.160110 | 2.512736  | N     | -1.637027 | 0.309109  | 1.487477  |
| H           | 3.850128  | -0.450869 | 1.433897  | C     | -3.002693 | 0.597631  | 1.508180  |
| H           | 4.750198  | 1.582831  | 2.453668  | O     | -3.493193 | 1.408331  | 2.296417  |
| H           | 4.377921  | 2.556142  | 0.924195  | C     | -5.162468 | -0.144196 | 0.220667  |
| H           | -4.087325 | 2.821262  | -0.186014 | H     | -5.759699 | -0.140539 | 1.135069  |
| H           | -3.936762 | -1.036916 | 0.766084  | H     | -5.408347 | 0.774422  | -0.327522 |
| H           | -4.509060 | 0.411313  | 1.623783  | C     | -5.338043 | -1.410700 | -0.643459 |
| H           | -4.139406 | 0.010791  | -1.383101 | H     | -6.107075 | -1.299731 | -1.408497 |
| H           | -5.484183 | 0.855031  | -0.582146 | H     | -5.611304 | -2.256300 | -0.006730 |
| H           | -1.195234 | -0.404435 | -2.989282 | C     | -3.952377 | -1.657100 | -1.256288 |
| H           | -0.585413 | -3.354437 | 1.006492  | H     | -3.661169 | -2.702686 | -1.358266 |
| H           | -2.933082 | -2.122073 | -2.400572 | H     | -3.806396 | -1.169269 | -2.225373 |

|       |           |           |           |       |           |           |           |
|-------|-----------|-----------|-----------|-------|-----------|-----------|-----------|
| O     | 1.317423  | -0.978918 | -1.493548 | C     | 1.508086  | -0.267221 | 1.432493  |
| H     | 0.450525  | -1.439250 | -1.541167 | C     | 0.110190  | 2.461210  | 0.493867  |
| O     | -1.191783 | -1.999382 | -1.207544 | H     | -0.634953 | 3.256923  | 0.566460  |
| C     | 3.841431  | -0.913910 | 0.282460  | H     | 1.097399  | 2.921889  | 0.385346  |
| C     | 5.014869  | -0.339514 | 1.092513  | H     | 0.092417  | 1.896850  | 1.430498  |
| H     | 4.689677  | -0.019537 | 2.086949  | C     | 3.131258  | -0.225527 | -0.355715 |
| H     | 5.784764  | -1.108939 | 1.203424  | N     | 2.786109  | -0.066894 | 1.062853  |
| H     | 5.440774  | 0.529579  | 0.587237  | N     | 1.417941  | -1.861567 | -0.361331 |
| C     | 4.343401  | -1.306619 | -1.120448 | C     | 2.692379  | -1.628465 | -0.796695 |
| H     | 4.761139  | -0.424513 | -1.614078 | O     | 3.368461  | -2.392769 | -1.459096 |
| H     | 3.538353  | -1.700291 | -1.742433 | C     | 2.250695  | 0.773808  | -1.143099 |
| H     | 5.134828  | -2.057383 | -1.024700 | H     | 2.506731  | 0.738714  | -2.206578 |
| C     | 3.290861  | -2.100747 | 1.048897  | H     | 2.485186  | 1.777718  | -0.773187 |
| C     | 3.111778  | -3.335599 | 0.583763  | C     | 4.636420  | 0.026979  | -0.385498 |
| H     | 3.061920  | -1.895299 | 2.097276  | H     | 5.156394  | -0.932324 | -0.300889 |
| H     | 3.315022  | -3.596797 | -0.449953 | H     | 4.951552  | 0.494588  | -1.320815 |
| H     | 2.741770  | -4.125943 | 1.229578  | C     | 4.886537  | 0.910124  | 0.850282  |
| H     | -1.100004 | 0.847410  | 2.164047  | H     | 5.921367  | 0.866702  | 1.194868  |
| 6-RRR |           |           |           | H     | 4.649741  | 1.955228  | 0.624124  |
| C     | 0.687864  | -0.707748 | 0.191890  | C     | 3.898794  | 0.372960  | 1.894725  |
| C     | 0.766107  | 0.401357  | -0.919531 | H     | 4.315204  | -0.475219 | 2.451390  |
| C     | -0.218643 | 1.574842  | -0.721324 | H     | 3.553278  | 1.120283  | 2.612739  |
| C     | -1.586137 | 0.960869  | -0.497282 | H     | 0.427790  | -0.124123 | -1.816515 |
| C     | -1.769248 | -0.570152 | -0.402819 | O     | -1.536285 | -1.272463 | -1.621078 |
| C     | -0.743348 | -1.075169 | 0.604303  | H     | -2.273659 | -1.106666 | -2.222093 |
| H     | -0.942328 | -0.625691 | 1.582619  | O     | 1.061290  | -0.121697 | 2.560539  |
| C     | -3.666135 | 0.699470  | 0.100676  | H     | 0.895355  | -2.611983 | -0.798066 |
| C     | -4.975156 | 0.995060  | 0.446087  | 6-RRS |           |           |           |
| C     | -5.832644 | -0.077790 | 0.716528  | C     | 0.357284  | 1.843012  | -0.318597 |
| C     | -5.386401 | -1.397985 | 0.640416  | C     | 1.655621  | 1.087497  | -0.194956 |
| C     | -4.059284 | -1.684942 | 0.292381  | C     | 1.737168  | -0.214176 | 0.628973  |
| C     | -3.211185 | -0.622701 | 0.034653  | C     | 0.700046  | -1.180966 | 0.062617  |
| H     | -5.312663 | 2.024516  | 0.502253  | H     | 0.676898  | -2.095602 | 0.664604  |
| H     | -6.864339 | 0.120264  | 0.989664  | C     | 3.690999  | 0.365071  | -0.510488 |
| H     | -6.073440 | -2.209812 | 0.855776  | C     | 4.999660  | 0.297586  | -0.961657 |
| H     | -3.709241 | -2.711832 | 0.228913  | C     | 5.784813  | -0.770544 | -0.512778 |
| N     | -2.635028 | 1.637418  | -0.206680 | C     | 5.268648  | -1.733337 | 0.356376  |
| H     | -0.842526 | -2.160097 | 0.720082  | C     | 3.941736  | -1.658395 | 0.800917  |
| C     | -0.247803 | 2.438741  | -1.992157 | C     | 3.167268  | -0.603395 | 0.351977  |
| H     | 0.724204  | 2.918917  | -2.147877 | H     | 5.391662  | 1.051735  | -1.635823 |
| H     | -0.479307 | 1.834558  | -2.875812 | H     | 6.814937  | -0.851645 | -0.845145 |
| H     | -1.009110 | 3.217011  | -1.894817 | H     | 5.901449  | -2.549856 | 0.688549  |

|                  |           |           |           |   |           |           |           |
|------------------|-----------|-----------|-----------|---|-----------|-----------|-----------|
| H                | 3.535554  | -2.406325 | 1.476506  | H | 2.030002  | -1.756337 | 1.619722  |
| N                | 2.729911  | 1.369478  | -0.837033 | H | 2.158348  | -0.179431 | 2.416797  |
| H                | 0.986995  | -1.472256 | -0.952234 | H | 0.401361  | 0.751675  | 1.238767  |
| C                | 0.049962  | 2.528168  | 1.032546  | C | -0.564465 | -1.068503 | 0.756952  |
| H                | 0.909371  | 3.144286  | 1.317405  | C | -0.337747 | -2.499752 | 0.248615  |
| H                | -0.148505 | 1.822625  | 1.837913  | H | -1.265517 | -3.064104 | 0.363340  |
| H                | -0.807646 | 3.199838  | 0.939261  | H | 0.457394  | -3.000346 | 0.815038  |
| C                | 0.474602  | 2.927758  | -1.394146 | H | -0.084698 | -2.535011 | -0.812326 |
| H                | -0.483949 | 3.444705  | -1.508719 | C | -1.219927 | -1.150894 | 2.137567  |
| H                | 1.233454  | 3.662904  | -1.113956 | H | -0.630071 | -1.795499 | 2.802738  |
| H                | 0.767508  | 2.501013  | -2.356942 | H | -2.221468 | -1.586394 | 2.041991  |
| O                | 1.448068  | -0.063446 | 2.015280  | H | -1.312654 | -0.162953 | 2.598407  |
| H                | 2.155524  | 0.444793  | 2.431950  | C | 0.972882  | 0.138841  | -0.708276 |
| C                | -0.716920 | 0.802555  | -0.778054 | C | 1.877105  | 1.379556  | -0.729509 |
| C                | -2.173855 | 1.339946  | -0.748154 | C | 3.164609  | -0.290823 | 0.499748  |
| H                | -2.251788 | 2.285118  | -0.203174 | N | 2.977641  | 1.102189  | 0.035556  |
| H                | -2.545233 | 1.510623  | -1.762862 | N | 1.811351  | -0.918313 | -1.311152 |
| H                | -0.456365 | 0.555577  | -1.816350 | C | 2.996485  | -1.201240 | -0.730303 |
| C                | -0.687732 | -0.558530 | -0.009373 | O | 3.800866  | -2.049958 | -1.096665 |
| C                | -1.640989 | -1.514809 | -0.768823 | C | 4.584275  | -0.289695 | 1.047601  |
| C                | -3.080490 | 0.292939  | -0.070674 | C | 5.290305  | 0.777043  | 0.195024  |
| N                | -2.883407 | -0.988156 | -0.766389 | C | 4.219848  | 1.863865  | 0.016778  |
| N                | -1.292308 | -0.381786 | 1.317356  | O | 1.690688  | 2.424784  | -1.326198 |
| C                | -2.546001 | 0.139697  | 1.365109  | C | -2.127253 | 0.946132  | 0.399133  |
| O                | -3.142702 | 0.475266  | 2.373754  | C | -3.532066 | 0.720987  | 0.204251  |
| C                | -4.586959 | 0.509109  | -0.143043 | C | -1.438833 | -0.275000 | -0.284355 |
| H                | -4.943076 | 1.055768  | 0.731938  | C | -3.633043 | -0.502146 | -0.551595 |
| H                | -4.831697 | 1.076517  | -1.048024 | C | -4.652811 | 1.464292  | 0.595299  |
| C                | -5.148472 | -0.920518 | -0.232419 | C | -4.961913 | -0.944589 | -0.889411 |
| H                | -6.160562 | -0.954767 | -0.640303 | C | -5.916255 | 1.014671  | 0.258371  |
| H                | -5.163537 | -1.368229 | 0.766483  | H | -4.509256 | 2.384607  | 1.158608  |
| C                | -4.131990 | -1.657272 | -1.115951 | C | -6.041075 | -0.196768 | -0.487059 |
| H                | -4.047499 | -2.726848 | -0.909954 | H | -5.087465 | -1.861629 | -1.458699 |
| H                | -4.349710 | -1.526755 | -2.182834 | H | -6.805066 | 1.565835  | 0.548691  |
| O                | -1.309775 | -2.576085 | -1.271695 | H | -7.041069 | -0.540452 | -0.748674 |
| H                | -0.714295 | -0.414239 | 2.149028  | N | -2.492966 | -1.093858 | -0.863047 |
|                  |           |           |           | O | -1.536253 | 1.873207  | 0.962103  |
| 6-shift-prod-SSR |           |           |           | H | 4.237744  | 2.586854  | 0.842222  |
|                  |           |           |           | H | 4.296191  | 2.418707  | -0.922474 |
| C                | 0.705774  | -0.197372 | 0.784225  | H | 5.547159  | 0.344253  | -0.777483 |
| C                | -0.411479 | 0.233302  | -1.344590 | H | 6.204560  | 1.159113  | 0.656277  |
| H                | -0.611931 | 1.266166  | -1.642172 | H | 4.565369  | 0.007809  | 2.102543  |
| H                | -0.487575 | -0.399980 | -2.234216 | H | 5.037637  | -1.278695 | 0.956376  |
| C                | 2.008786  | -0.673400 | 1.451434  | H | 1.507207  | -1.429611 | -2.128285 |

|                 |           |           |           |       |           |           |           |
|-----------------|-----------|-----------|-----------|-------|-----------|-----------|-----------|
|                 |           |           |           | H     | -0.291705 | 2.732411  | 2.574078  |
| 6-shift-sub-SSR |           |           |           | H     | 1.050222  | 1.559404  | 2.802303  |
|                 |           |           |           | H     | 1.351627  | 3.144260  | 2.028412  |
| C               | 3.522889  | 0.512024  | -0.527381 | C     | -0.032160 | 2.814378  | -0.223263 |
| C               | 3.190745  | -0.657758 | 0.170901  | H     | -0.437555 | 2.440248  | -1.167550 |
| C               | 1.595534  | 0.999764  | 0.330954  | H     | -0.755576 | 3.511700  | 0.212626  |
| C               | 1.807026  | -0.453185 | 0.792226  | H     | 0.878577  | 3.372837  | -0.454034 |
| N               | 2.510751  | 1.514129  | -0.417746 | H     | -0.406868 | 0.040944  | -2.100049 |
| O               | 1.636213  | -0.694590 | 2.095298  |       |           |           |           |
| C               | 0.333107  | 1.694834  | 0.763779  | 6-SSR |           |           |           |
| C               | -0.756411 | 0.587265  | 0.993921  | C     | 0.705353  | -0.429513 | 0.322362  |
| H               | -0.522640 | 0.140303  | 1.963898  | C     | 0.730786  | 0.742033  | -0.716121 |
| C               | -0.640530 | -0.595220 | -0.028984 | C     | -0.392699 | 1.793817  | -0.515524 |
| C               | 0.757828  | -1.223078 | -0.107477 | C     | -1.698101 | 1.043317  | -0.365852 |
| H               | 1.070633  | -1.277598 | -1.159654 | C     | -1.727897 | -0.494265 | -0.387714 |
| H               | 0.716381  | -2.240272 | 0.291045  | C     | -0.696700 | -0.971360 | 0.634280  |
| C               | -2.207813 | 1.133229  | 0.966995  | H     | -0.668352 | -2.065750 | 0.637598  |
| H               | -2.701272 | 0.983151  | 1.933101  | C     | -3.755715 | 0.537370  | 0.141452  |
| H               | -2.246275 | 2.201120  | 0.734968  | C     | -5.096395 | 0.674596  | 0.464413  |
| C               | -1.725708 | -1.653520 | 0.308219  | C     | -5.847689 | -0.495791 | 0.624485  |
| O               | -1.543616 | -2.842045 | 0.510454  | C     | -5.268931 | -1.755766 | 0.463931  |
| N               | -2.950071 | -1.065615 | 0.285265  | C     | -3.911086 | -1.883154 | 0.139778  |
| N               | -1.072070 | -0.065688 | -1.344912 | C     | -3.169137 | -0.724914 | -0.008940 |
| C               | -2.286260 | 0.521941  | -1.428148 | H     | -5.538116 | 1.658071  | 0.585244  |
| O               | -2.737045 | 1.115846  | -2.400896 | H     | -6.901056 | -0.422438 | 0.876218  |
| C               | -3.018060 | 0.354316  | -0.083376 | H     | -5.876681 | -2.645451 | 0.592814  |
| C               | -4.514095 | 0.623553  | -0.174336 | H     | -3.455870 | -2.861147 | 0.008494  |
| C               | -4.234086 | -1.745560 | 0.217231  | N     | -2.815794 | 1.593315  | -0.061339 |
| H               | -4.113705 | -2.715953 | -0.272423 | H     | -1.023692 | -0.621697 | 1.620208  |
| H               | -4.633377 | -1.919787 | 1.225087  | C     | -0.462741 | 2.693169  | -1.761954 |
| C               | -5.095845 | -0.744984 | -0.568038 | H     | -0.608632 | 2.098430  | -2.669697 |
| H               | -4.954615 | -0.898780 | -1.643088 | H     | 0.464231  | 3.266604  | -1.869678 |
| H               | -6.161131 | -0.839648 | -0.342699 | H     | -1.296237 | 3.394180  | -1.668185 |
| H               | -4.724822 | 1.406309  | -0.905573 | C     | 1.624485  | -1.538715 | -0.257772 |
| H               | -4.886844 | 0.933378  | 0.809218  | C     | -0.221572 | 2.681141  | 0.732132  |
| C               | 4.722644  | 0.630274  | -1.217118 | H     | -1.070095 | 3.366350  | 0.794170  |
| C               | 5.609496  | -0.453259 | -1.182638 | H     | 0.696794  | 3.272434  | 0.679506  |
| C               | 4.072838  | -1.722126 | 0.211484  | H     | -0.194470 | 2.090837  | 1.650966  |
| C               | 5.292715  | -1.613998 | -0.472750 | C     | 3.107079  | 0.362957  | -0.019303 |
| H               | 3.821160  | -2.614151 | 0.780205  | N     | 2.852444  | -1.012383 | -0.488620 |
| H               | 6.002621  | -2.437008 | -0.448360 | N     | 1.381201  | 0.015914  | 1.552202  |
| H               | 6.559802  | -0.386515 | -1.706262 | C     | 2.678683  | 0.415917  | 1.458068  |
| H               | 4.960452  | 1.543602  | -1.755654 | O     | 3.380207  | 0.772424  | 2.387839  |
| C               | 0.632851  | 2.325540  | 2.141684  |       |           |           |           |

|    |           |           |           |           |           |           |           |
|----|-----------|-----------|-----------|-----------|-----------|-----------|-----------|
| C  | 2.166718  | 1.318256  | -0.773102 | C         | 4.628920  | -0.054203 | 1.088339  |
| H  | 2.505147  | 1.401103  | -1.810183 | H         | 5.351135  | 0.519030  | 0.498869  |
| H  | 2.235067  | 2.312795  | -0.321343 | H         | 4.687143  | 0.295930  | 2.121571  |
| C  | 4.608183  | 0.529987  | -0.211360 | C         | 4.866313  | -1.567856 | 0.944751  |
| H  | 5.021864  | 1.226964  | 0.519586  | H         | 5.925224  | -1.831664 | 0.970058  |
| H  | 4.805332  | 0.904600  | -1.222024 | H         | 4.362681  | -2.109829 | 1.752688  |
| C  | 5.145914  | -0.901385 | -0.047305 | C         | 4.205719  | -1.915818 | -0.395012 |
| H  | 5.204990  | -1.144305 | 1.018327  | H         | 3.841662  | -2.943630 | -0.461966 |
| H  | 6.136012  | -1.036576 | -0.487096 | H         | 4.880598  | -1.731551 | -1.239784 |
| C  | 4.078316  | -1.772721 | -0.724092 | O         | 1.696236  | -1.947402 | -1.988091 |
| H  | 3.977224  | -2.773137 | -0.296351 | C         | -2.563847 | 1.099332  | -0.647771 |
| H  | 4.258372  | -1.874667 | -1.800522 | C         | -3.749068 | 0.320139  | -0.278682 |
| H  | 0.525786  | 0.265315  | -1.678497 | C         | -1.340412 | 0.198111  | -0.369227 |
| O  | -1.378405 | -1.059455 | -1.642425 | C         | -3.319590 | -0.987903 | -0.005067 |
| H  | -2.114906 | -0.931110 | -2.253315 | C         | -5.094214 | 0.679009  | -0.209096 |
| O  | 1.303525  | -2.699671 | -0.437832 | C         | -4.244666 | -1.965513 | 0.381078  |
| H  | 0.968597  | -0.115558 | 2.466233  | C         | -6.016661 | -0.286470 | 0.172536  |
| BA |           |           |           | H         | -5.392675 | 1.696566  | -0.442758 |
| C  | -0.553775 | 0.651576  | 0.932436  | C         | -5.580883 | -1.591115 | 0.465223  |
| C  | -0.289429 | 0.231070  | -1.502176 | H         | -3.932058 | -2.981941 | 0.598013  |
| H  | -0.437515 | -0.603714 | -2.191043 | H         | -7.070119 | -0.041673 | 0.247922  |
| H  | -0.393777 | 1.167876  | -2.059494 | H         | -6.313290 | -2.335453 | 0.763884  |
| C  | -0.397995 | 2.178731  | 0.973705  | N         | -1.963449 | -1.118806 | -0.216371 |
| H  | 0.364359  | 2.462194  | 1.705406  | H         | -1.456617 | -1.882771 | 0.206882  |
| H  | -1.340441 | 2.642632  | 1.276731  | O         | -2.497455 | 2.225555  | -1.095954 |
| H  | -0.125976 | 2.609178  | 0.010042  | H         | 1.621461  | 2.079952  | -1.648021 |
| C  | -1.209996 | 0.194460  | 2.236438  | H2O       |           |           |           |
| H  | -2.223690 | 0.597411  | 2.331562  | O         | -0.000000 | 0.000000  | 0.115587  |
| H  | -0.624702 | 0.560739  | 3.086866  | H         | -0.000000 | 0.768653  | -0.462347 |
| H  | -1.269442 | -0.894966 | 2.316630  | H         | -0.000000 | -0.768653 | -0.462347 |
| C  | 0.774705  | -0.089950 | 0.678509  | OH        |           |           |           |
| C  | 2.049103  | 0.172054  | 1.498189  | O         | 0.000000  | -0.000000 | 0.107382  |
| H  | 2.198777  | -0.602076 | 2.257245  | H         | -0.000000 | 0.000000  | -0.859054 |
| H  | 2.033587  | 1.141099  | 2.008127  | TS23-acid |           |           |           |
| H  | 0.544517  | -1.161766 | 0.769857  | C         | 0.056471  | -0.277976 | 0.863852  |
| C  | 1.079224  | 0.139366  | -0.830708 | C         | 1.087175  | 3.125474  | -0.924888 |
| C  | 1.973653  | -1.054345 | -1.204716 | C         | -0.673751 | -0.623676 | -0.419802 |
| C  | 3.238881  | 0.155939  | 0.496525  | C         | -0.034143 | 3.655149  | -1.415712 |
| N  | 3.083774  | -0.986206 | -0.428257 |           |           |           |           |
| N  | 1.881560  | 1.356464  | -0.990879 |           |           |           |           |
| C  | 3.076487  | 1.426123  | -0.345278 |           |           |           |           |
| O  | 3.871363  | 2.345826  | -0.404792 |           |           |           |           |



|   |           |           |           |   |           |           |           |
|---|-----------|-----------|-----------|---|-----------|-----------|-----------|
| C | -3.460881 | -0.069880 | -0.203293 | H | 0.058969  | 3.876890  | 1.504169  |
| C | -2.568409 | 0.970194  | -0.758264 | H | 1.701887  | 0.984800  | -1.864595 |
| C | -4.759277 | 0.014632  | 0.090441  | H | 1.799614  | 0.942004  | 2.840598  |
| N | -2.959805 | -1.372612 | 0.018135  |   |           |           |           |
| N | -1.298706 | 0.526208  | -1.041716 |   |           |           |           |
| C | -1.669407 | -1.742296 | -0.037925 |   |           |           |           |
| O | -1.246901 | -2.852080 | 0.237166  | C | -0.191849 | -0.124665 | -1.458461 |
| C | -4.053758 | -2.269159 | 0.437802  | C | 1.029262  | 2.312237  | 0.591239  |
| C | -5.271116 | -1.318627 | 0.577972  | C | 0.265710  | -1.466763 | -0.851274 |
| O | -2.929363 | 2.109931  | -0.991029 | C | 2.185779  | 2.562051  | -0.019995 |
| C | 1.522409  | 0.955134  | 0.230311  | C | 2.417681  | -0.808083 | 0.877590  |
| C | 2.584347  | -0.714338 | -0.906965 | C | 1.055066  | -0.943346 | 1.446405  |
| C | 2.669724  | -1.065387 | 0.447716  | C | 3.537831  | -0.386940 | 1.469391  |
| C | 3.092281  | -1.539255 | -1.910764 | N | 2.650146  | -1.245283 | -0.438079 |
| C | 3.283180  | -2.255465 | 0.853717  | N | 0.187914  | -1.559257 | 0.606712  |
| C | 3.704804  | -2.714164 | -1.496800 | C | 1.706253  | -1.676248 | -1.320236 |
| C | 3.804489  | -3.070683 | -0.136679 | O | 1.983326  | -2.108257 | -2.425540 |
| C | 1.262048  | 2.461192  | 0.436464  | C | 4.091273  | -1.229595 | -0.720523 |
| C | 2.574811  | 3.025201  | 1.035312  | C | 4.689938  | -0.472804 | 0.493526  |
| C | 0.090460  | 2.793559  | 1.367686  | O | 0.760467  | -0.585056 | 2.584597  |
| N | 1.934168  | 0.513059  | -1.000769 | C | -1.196674 | 1.389708  | 0.009558  |
| C | 2.007854  | -0.010247 | 1.177794  | C | -2.456771 | -0.296380 | 0.858865  |
| O | 2.096560  | 0.086026  | 2.500912  | C | -2.630211 | -0.381623 | -0.519106 |
| H | -0.459096 | 0.457128  | 1.478185  | C | -3.050717 | -1.169933 | 1.761249  |
| H | 0.255010  | -1.182467 | 1.440111  | C | -3.473837 | -1.347820 | -1.048007 |
| H | 2.008016  | 3.222724  | -1.502343 | C | -3.883191 | -2.149990 | 1.216664  |
| H | 0.012190  | -1.105915 | -1.125029 | C | -4.097167 | -2.233799 | -0.165988 |
| H | -0.020735 | 4.151741  | -2.380908 | C | -0.349724 | 2.645236  | 0.041693  |
| H | -0.993094 | 3.621299  | -0.904450 | C | -1.032285 | 3.622475  | 1.031159  |
| H | -5.348250 | 0.915699  | -0.019204 | C | -0.299618 | 3.307608  | -1.339712 |
| H | -0.704852 | 1.236971  | -1.456415 | N | -1.564547 | 0.770169  | 1.121923  |
| H | -4.201546 | -3.035323 | -0.326862 | C | -1.799852 | 0.692651  | -1.191674 |
| H | -3.773289 | -2.765528 | 1.368626  | O | -2.150813 | 1.269567  | -2.266170 |
| H | -6.120973 | -1.660256 | -0.018747 | H | 0.608893  | 0.615638  | -1.378323 |
| H | -5.617808 | -1.246609 | 1.613956  | H | -0.415352 | -0.269690 | -2.516488 |
| H | 3.020303  | -1.276349 | -2.960515 | H | 1.048211  | 1.847762  | 1.579883  |
| H | 3.347290  | -2.519294 | 1.903800  | H | -0.331662 | -2.282465 | -1.262896 |
| H | 4.120309  | -3.380300 | -2.245493 | H | 3.124479  | 2.306206  | 0.461264  |
| H | 4.293008  | -4.000153 | 0.132200  | H | 2.237534  | 3.021744  | -1.002055 |
| H | 2.763152  | 2.662451  | 2.050681  | H | 3.590601  | -0.026957 | 2.488178  |
| H | 3.436591  | 2.761122  | 0.415173  | H | -0.725656 | -1.750687 | 0.999454  |
| H | 2.505580  | 4.114879  | 1.080589  | H | 4.456982  | -2.258913 | -0.788774 |
| H | -0.875065 | 2.482135  | 0.959868  | H | 4.270775  | -0.741017 | -1.679714 |
| H | 0.204946  | 2.348445  | 2.362816  | H | 5.550780  | -0.999398 | 0.913456  |

TS23-base-acid

|           |           |           |           |              |           |           |           |
|-----------|-----------|-----------|-----------|--------------|-----------|-----------|-----------|
| H         | 5.034510  | 0.530557  | 0.213561  | H            | -0.087996 | 2.455330  | -1.533017 |
| H         | -2.877049 | -1.096887 | 2.830579  | H            | 0.251205  | -1.806947 | -0.315124 |
| H         | -3.635376 | -1.394594 | -2.120752 | H            | -2.139805 | 3.278143  | -0.606240 |
| H         | -4.378043 | -2.852817 | 1.878659  | H            | -1.351661 | 3.512223  | 1.062017  |
| H         | -4.761830 | -2.999733 | -0.552282 | H            | -4.835462 | 0.937407  | -1.177266 |
| H         | -2.067020 | 3.811710  | 0.731657  | H            | -0.033796 | 0.146247  | -1.687105 |
| H         | -1.028014 | 3.240111  | 2.056335  | H            | -4.362800 | -2.671502 | 0.529280  |
| H         | -0.483713 | 4.567695  | 1.020929  | H            | -4.000240 | -1.805033 | 2.030067  |
| H         | 0.164057  | 2.668782  | -2.093829 | H            | -6.076056 | -1.051928 | 0.175305  |
| H         | -1.308790 | 3.517070  | -1.695261 | H            | -5.402418 | 0.046420  | 1.378515  |
| H         | 0.267329  | 4.239933  | -1.258018 | H            | 2.703615  | -1.285543 | -2.975038 |
| H         | -1.101482 | 0.872638  | 2.023266  | H            | 3.343612  | -2.350070 | 1.877961  |
|           |           |           |           | H            | 3.702582  | -3.462568 | -2.278923 |
| TS23-base |           |           |           | H            | 4.020695  | -4.003989 | 0.112594  |
|           |           |           |           | H            | 3.238061  | 3.306043  | 0.002930  |
| C         | 0.169536  | -0.178672 | 1.095905  | H            | 2.322643  | 3.190232  | -1.512477 |
| C         | -0.110754 | 2.751767  | -0.483651 | H            | 1.976644  | 4.512655  | -0.360361 |
| C         | -0.458397 | -1.032816 | -0.002185 | H            | 0.398994  | 2.423263  | 2.294296  |
| C         | -1.255683 | 3.213804  | 0.021374  | H            | 2.080355  | 2.896825  | 2.208631  |
| C         | -3.129495 | -0.193227 | -0.561436 | H            | 0.806669  | 4.070576  | 1.757306  |
| C         | -2.031715 | 0.295693  | -1.442284 |              |           |           |           |
| C         | -4.413813 | 0.173014  | -0.539851 | TS23-neutral |           |           |           |
| N         | -2.864352 | -1.211404 | 0.365006  | C            | -0.116385 | 0.045754  | -0.949106 |
| N         | -0.830488 | -0.262260 | -1.193752 | C            | -0.025255 | 2.850389  | 0.534123  |
| C         | -1.645898 | -1.770487 | 0.607300  | C            | 0.505054  | -0.877454 | 0.087578  |
| O         | -1.521430 | -2.746861 | 1.332680  | C            | 1.098102  | 3.396693  | 0.069542  |
| C         | -4.117801 | -1.689761 | 0.951130  | C            | 3.237804  | -0.218097 | 0.537083  |
| C         | -5.144123 | -0.605638 | 0.534451  | C            | 2.206943  | 0.354060  | 1.443322  |
| O         | -2.253531 | 1.105244  | -2.338618 | C            | 4.541676  | 0.054268  | 0.473627  |
| C         | 1.678049  | 1.134319  | 0.098815  | N            | 2.874636  | -1.231257 | -0.373038 |
| C         | 2.481999  | -0.603904 | -0.934566 | N            | 0.967234  | -0.178517 | 1.277171  |
| C         | 2.656291  | -0.924335 | 0.425794  | C            | 1.616524  | -1.637258 | -0.646855 |
| C         | 2.852473  | -1.524075 | -1.925165 | O            | 1.352831  | -2.501015 | -1.470337 |
| C         | 3.214209  | -2.133371 | 0.820516  | C            | 4.070672  | -1.760265 | -1.043614 |
| C         | 3.406679  | -2.736970 | -1.525159 | C            | 5.200484  | -0.802453 | -0.583473 |
| C         | 3.588429  | -3.046958 | -0.165765 | O            | 2.482577  | 1.186846  | 2.292537  |
| C         | 1.200094  | 2.577435  | 0.255551  | C            | -1.572251 | 1.043744  | -0.113751 |
| C         | 2.254774  | 3.456853  | -0.455450 | C            | -2.394584 | -0.645860 | 0.984696  |
| C         | 1.113134  | 3.018396  | 1.719601  | C            | -2.649493 | -0.974980 | -0.375911 |
| N         | 1.887169  | 0.640053  | -1.120609 | C            | -2.770168 | -1.564246 | 1.996667  |
| C         | 2.166984  | 0.244253  | 1.206670  | C            | -3.270799 | -2.184442 | -0.745858 |
| O         | 2.444340  | 0.516972  | 2.398760  | C            | -3.387452 | -2.735519 | 1.618763  |
| H         | -0.435531 | 0.706184  | 1.307739  | C            | -3.642063 | -3.053121 | 0.256398  |
| H         | 0.329519  | -0.763442 | 2.002264  |              |           |           |           |

|             |           |           |           |             |           |           |           |
|-------------|-----------|-----------|-----------|-------------|-----------|-----------|-----------|
| C           | -1.275734 | 2.540807  | -0.267138 | H           | -2.463519 | -0.079442 | 2.080442  |
| C           | -2.463902 | 3.279012  | 0.387188  | H           | -2.963025 | -1.766576 | 1.540165  |
| C           | -1.172016 | 2.990676  | -1.727426 | C           | -4.813319 | 0.380239  | 0.291430  |
| N           | -1.768269 | 0.548299  | 1.140270  | C           | -4.481263 | 1.748747  | 0.923430  |
| C           | -2.132295 | 0.130424  | -1.105299 | C           | -3.316766 | 2.298237  | 0.080786  |
| O           | -2.347271 | 0.419320  | -2.404769 | H           | -0.819268 | -2.164951 | 0.544916  |
| H           | 0.462043  | 0.964925  | -1.056178 | H           | -3.710578 | -2.805099 | -1.780852 |
| H           | -0.196689 | -0.447464 | -1.918249 | O           | -0.659727 | 1.955963  | -0.983024 |
| H           | -0.080688 | 2.577809  | 1.587967  | C           | 0.300563  | -0.466421 | 1.333410  |
| H           | -0.218986 | -1.643062 | 0.388066  | C           | 0.045962  | 0.899083  | 1.989322  |
| H           | 1.939966  | 3.559185  | 0.735021  | H           | 0.993479  | 1.343811  | 2.299453  |
| H           | 1.218338  | 3.690624  | -0.969941 | H           | -0.568533 | 0.757707  | 2.883720  |
| H           | 5.035378  | 0.789595  | 1.094058  | H           | -0.448943 | 1.613746  | 1.328569  |
| H           | 0.222283  | 0.242405  | 1.830085  | C           | 0.973807  | -1.348766 | 2.407947  |
| H           | 4.238303  | -2.791424 | -0.719636 | H           | 0.354178  | -1.347863 | 3.309558  |
| H           | 3.907528  | -1.767025 | -2.122995 | H           | 1.959697  | -0.946304 | 2.669792  |
| H           | 6.057080  | -1.353986 | -0.186482 | H           | 1.104728  | -2.378412 | 2.072436  |
| H           | 5.571683  | -0.186148 | -1.409947 | C           | 2.451396  | -1.293155 | 0.035636  |
| H           | -2.572117 | -1.331286 | 3.037899  | C           | 3.643245  | -0.458646 | -0.099555 |
| H           | -3.457865 | -2.435496 | -1.787618 | C           | 1.223358  | -0.336395 | 0.028226  |
| H           | -3.689004 | -3.446796 | 2.381921  | C           | 3.210303  | 0.872663  | -0.215845 |
| H           | -4.127779 | -3.991083 | 0.010851  | C           | 4.992535  | -0.804274 | -0.178696 |
| H           | -3.402875 | 3.001687  | -0.104112 | C           | 4.146510  | 1.894168  | -0.442097 |
| H           | -2.538603 | 3.023244  | 1.445454  | C           | 5.922122  | 0.204611  | -0.386039 |
| H           | -2.320449 | 4.358850  | 0.284723  | H           | 5.286625  | -1.845723 | -0.087356 |
| H           | -0.398565 | 2.460723  | -2.291304 | C           | 5.485732  | 1.536893  | -0.520982 |
| H           | -2.121462 | 2.839559  | -2.244114 | H           | 3.832138  | 2.927511  | -0.545597 |
| H           | -0.934738 | 4.058016  | -1.752117 | H           | 6.979658  | -0.024841 | -0.453225 |
| H           | -2.642269 | -0.376548 | -2.866954 | H           | 6.223547  | 2.315572  | -0.692647 |
|             |           |           |           | N           | 1.853289  | 0.978221  | -0.059583 |
| TS47-DE-RRR |           |           |           | H           | 1.310002  | 1.731454  | -0.469115 |
|             |           |           |           | O           | 2.369728  | -2.504955 | 0.075179  |
| C           | -1.030374 | -0.429784 | -1.092486 | H           | -5.202292 | -0.346536 | 1.008140  |
| C           | -0.996055 | -1.161548 | 0.934896  | H           | -5.549165 | 0.475437  | -0.516213 |
| C           | 0.429467  | -0.709129 | -1.263447 | H           | -4.154501 | 1.609891  | 1.957761  |
| H           | 0.538824  | -1.780864 | -1.452861 | H           | -5.336123 | 2.426333  | 0.930342  |
| H           | 0.855428  | -0.154467 | -2.107150 | H           | -2.575351 | 2.864165  | 0.649489  |
| C           | -1.408576 | 0.976453  | -0.864306 | H           | -3.657229 | 2.921509  | -0.752432 |
| C           | -3.489608 | -0.041445 | -0.279525 |             |           |           |           |
| N           | -2.699940 | 1.081936  | -0.451131 | TS47-DE-RRS |           |           |           |
| N           | -1.956774 | -1.307971 | -1.546963 |             |           |           |           |
| C           | -3.180313 | -1.122249 | -1.121794 | C           | 0.387056  | -1.150960 | 1.006826  |
| O           | -4.138973 | -2.051283 | -1.350020 | C           | 0.382240  | -0.594711 | -1.449137 |
| C           | -2.264400 | -0.940806 | 1.447908  | H           | 0.784519  | 0.111269  | -2.183783 |

|   |           |           |           |             |           |           |           |
|---|-----------|-----------|-----------|-------------|-----------|-----------|-----------|
| H | 0.415861  | -1.604529 | -1.864955 | N           | 1.635048  | 0.839165  | 0.144735  |
| C | 0.027866  | -2.622501 | 0.774799  | H           | 1.056139  | 1.578661  | -0.251409 |
| H | -0.518590 | -2.997880 | 1.646627  | O           | 2.708332  | -2.444223 | -0.654317 |
| H | 0.931260  | -3.222351 | 0.654002  |             |           |           |           |
| H | -0.598987 | -2.765767 | -0.108297 | TS47-DE-SSR |           |           |           |
| C | 1.175053  | -1.039282 | 2.324742  | C           | -0.873585 | 0.314869  | 1.127287  |
| H | 2.075713  | -1.662511 | 2.283856  | C           | 0.493856  | 0.260573  | -1.351105 |
| H | 0.557764  | -1.391850 | 3.156179  | H           | 0.866917  | -0.636689 | -1.855705 |
| H | 1.473069  | -0.006369 | 2.521442  | H           | 0.617546  | 1.117908  | -2.018783 |
| C | -0.847863 | -0.262779 | 1.108039  | C           | -2.142774 | 0.740456  | 1.497920  |
| C | -2.130450 | -0.609844 | 1.533234  | H           | -2.401434 | 1.795661  | 1.545475  |
| H | -2.658508 | 0.069046  | 2.196589  | H           | -2.755115 | 0.088342  | 2.113163  |
| H | -2.425718 | -1.653314 | 1.620461  | H           | -0.635481 | -0.723679 | 1.352786  |
| H | -0.572439 | 0.777947  | 1.289991  | C           | 0.384297  | 1.174191  | 1.032904  |
| C | -1.045129 | -0.269465 | -1.104981 | C           | 0.102303  | 2.636081  | 0.665130  |
| C | -1.446796 | 1.134472  | -0.940408 | H           | 1.033969  | 3.207989  | 0.704144  |
| C | -3.427282 | 0.100878  | -0.072696 | H           | -0.582227 | 3.082299  | 1.393209  |
| N | -2.731606 | 1.232637  | -0.475142 | H           | -0.342568 | 2.738047  | -0.327921 |
| N | -1.969927 | -1.234852 | -1.345575 | C           | 1.091373  | 1.153384  | 2.401278  |
| C | -3.152320 | -1.057669 | -0.826918 | H           | 0.502501  | 1.718920  | 3.129478  |
| O | -4.083266 | -2.035220 | -0.869718 | H           | 2.080099  | 1.619047  | 2.316420  |
| C | -4.729485 | 0.538931  | 0.537539  | H           | 1.210854  | 0.134340  | 2.778159  |
| H | -5.511465 | 0.532092  | -0.231010 | C           | -0.972490 | 0.126219  | -1.062105 |
| H | -5.050146 | -0.124099 | 1.343900  | C           | -1.550780 | -1.225168 | -0.918570 |
| C | -4.406407 | 1.973296  | 1.005423  | C           | -3.457938 | 0.065789  | -0.210664 |
| H | -5.285153 | 2.619661  | 1.008364  | N           | -2.856680 | -1.146592 | -0.486381 |
| H | -4.006098 | 1.952012  | 2.023069  | N           | -1.761869 | 1.176014  | -1.403933 |
| C | -3.324215 | 2.473190  | 0.030364  | C           | -2.991608 | 1.155738  | -0.961178 |
| H | -2.546334 | 3.081751  | 0.498081  | O           | -3.793397 | 2.240007  | -1.098088 |
| H | -3.741475 | 3.039836  | -0.807626 | C           | -4.829139 | -0.193318 | 0.346660  |
| H | -3.668333 | -2.809034 | -1.278739 | C           | -4.697634 | -1.632255 | 0.889339  |
| O | -0.720639 | 2.122177  | -1.110266 | C           | -3.626493 | -2.291217 | 0.001144  |
| C | 2.587841  | -1.269239 | -0.366797 | H           | -3.254822 | 2.943842  | -1.486992 |
| C | 3.637787  | -0.267580 | -0.170326 | O           | -0.972487 | -2.288752 | -1.103998 |
| C | 1.236598  | -0.543416 | -0.167072 | H           | -5.567262 | -0.133115 | -0.462164 |
| C | 3.007966  | 0.963719  | 0.056755  | H           | -5.110022 | 0.538974  | 1.106889  |
| C | 5.026558  | -0.381497 | -0.247463 | H           | -4.352968 | -1.608359 | 1.927057  |
| C | 3.776034  | 2.129808  | 0.186091  | H           | -5.642918 | -2.176326 | 0.865212  |
| C | 5.790994  | 0.766947  | -0.102139 | H           | -4.057799 | -2.826523 | -0.850996 |
| H | 5.477582  | -1.352681 | -0.428476 | H           | -2.960785 | -2.976431 | 0.531248  |
| C | 5.156664  | 2.007060  | 0.103926  | C           | 1.934808  | -0.818352 | 0.443644  |
| H | 3.304141  | 3.093191  | 0.349452  | C           | 3.371668  | -0.740478 | 0.144909  |
| H | 6.873034  | 0.718827  | -0.154409 | C           | 1.307835  | 0.523067  | -0.042761 |
| H | 5.767878  | 2.899433  | 0.204156  |             |           |           |           |

|             |           |           |           |          |           |           |           |
|-------------|-----------|-----------|-----------|----------|-----------|-----------|-----------|
| C           | 3.636795  | 0.543955  | -0.340885 | H        | -4.952305 | -0.876444 | 1.564673  |
| C           | 4.375888  | -1.696515 | 0.278516  | C        | -4.454461 | -1.155076 | -0.530274 |
| C           | 4.932653  | 0.895449  | -0.733754 | H        | -4.173402 | -2.184722 | -0.295257 |
| C           | 5.666936  | -1.354003 | -0.104452 | H        | -5.016140 | -1.162828 | -1.469751 |
| H           | 4.132082  | -2.682339 | 0.662874  | H        | -1.905079 | 3.652446  | -0.432906 |
| C           | 5.927763  | -0.068633 | -0.609268 | O        | -1.973364 | -1.918765 | -1.746894 |
| H           | 5.156231  | 1.886515  | -1.115788 | C        | 2.537433  | -1.276901 | -0.293367 |
| H           | 6.474190  | -2.073197 | -0.021856 | C        | 3.698448  | -0.383473 | -0.199302 |
| H           | 6.940488  | 0.183731  | -0.909929 | C        | 1.282281  | -0.403786 | -0.076928 |
| N           | 2.498473  | 1.334782  | -0.317473 | C        | 3.219207  | 0.912741  | 0.024096  |
| H           | 2.414964  | 2.063424  | -1.014044 | C        | 5.059662  | -0.647526 | -0.348020 |
| O           | 1.337344  | -1.732604 | 0.968167  | C        | 4.109719  | 1.992123  | 0.075824  |
| TS47-DE-SSS |           |           |           | C        | 5.948719  | 0.416730  | -0.283467 |
| C           | 0.394827  | -0.888207 | 1.124929  | H        | 5.394276  | -1.665976 | -0.521214 |
| C           | 0.407087  | -0.356530 | -1.347238 | C        | 5.463901  | 1.721428  | -0.080878 |
| H           | 0.881262  | 0.284936  | -2.097123 | H        | 3.754871  | 3.004306  | 0.242092  |
| H           | 0.309195  | -1.363956 | -1.760260 | H        | 7.014489  | 0.250849  | -0.395086 |
| C           | -0.112703 | -2.323228 | 0.959399  | H        | 6.170496  | 2.545347  | -0.041394 |
| H           | -0.810338 | -2.547196 | 1.774313  | N        | 1.843803  | 0.932718  | 0.201438  |
| H           | 0.718528  | -3.027927 | 1.022603  | H        | 1.335941  | 1.719560  | -0.188191 |
| H           | -0.622738 | -2.496988 | 0.011066  | O        | 2.522399  | -2.469569 | -0.516676 |
| C           | 1.201083  | -0.799862 | 2.434020  | TS47-RRR |           |           |           |
| H           | 2.062752  | -1.476117 | 2.394865  | C        | -0.406123 | -0.344413 | -1.370353 |
| H           | 0.570405  | -1.104796 | 3.274136  | C        | 0.715074  | 0.212515  | 1.232134  |
| H           | 1.561802  | 0.215473  | 2.615183  | C        | 0.987203  | 0.085465  | -1.044598 |
| C           | -0.719739 | 0.144336  | 1.185594  | C        | 1.986605  | 0.103438  | 1.744017  |
| C           | -2.013788 | 0.098193  | 1.688939  | C        | 3.388359  | 0.711273  | -0.090955 |
| H           | -2.368460 | 0.915775  | 2.309621  | C        | 2.537346  | 1.833069  | -0.436157 |
| H           | -2.518572 | -0.856826 | 1.826818  | C        | 4.779786  | 0.819347  | 0.445999  |
| H           | -0.293313 | 1.146884  | 1.231756  | N        | 3.231321  | -0.478628 | -0.728001 |
| C           | -0.963527 | 0.153000  | -0.987622 | N        | 1.376603  | 1.416396  | -1.056993 |
| C           | -2.069953 | -0.818249 | -1.205976 | C        | 2.012592  | -0.925535 | -1.183822 |
| C           | -3.282059 | 0.839778  | 0.012438  | O        | 1.855025  | -2.094177 | -1.574616 |
| N           | -3.245225 | -0.349448 | -0.699559 | C        | 4.380420  | -1.374707 | -0.544264 |
| N           | -1.239596 | 1.491175  | -0.980647 | C        | 5.214577  | -0.657195 | 0.532172  |
| C           | -2.386833 | 1.828022  | -0.453329 | O        | 2.787170  | 3.008785  | -0.167566 |
| O           | -2.681984 | 3.126876  | -0.195727 | C        | -1.294615 | -0.421635 | -0.091903 |
| C           | -4.673882 | 1.023586  | 0.551398  | C        | -3.617881 | -0.697113 | -0.270165 |
| H           | -5.253940 | 1.641507  | -0.144708 | C        | -3.455960 | 0.676053  | -0.030206 |
| H           | -4.681133 | 1.524226  | 1.521840  | C        | -4.898182 | -1.228730 | -0.472656 |
| C           | -5.202563 | -0.424946 | 0.600733  | C        | -4.545468 | 1.546030  | 0.024340  |
| H           | -6.285028 | -0.479883 | 0.476866  | C        | -5.975361 | -0.353311 | -0.412754 |

|          |           |           |           |          |           |           |           |
|----------|-----------|-----------|-----------|----------|-----------|-----------|-----------|
| C        | -5.816717 | 1.022383  | -0.161482 | H        | -5.108738 | -0.127726 | 1.262161  |
| C        | -0.433145 | -0.774459 | 1.174751  | H        | -5.566587 | 0.554360  | -0.296365 |
| C        | 0.015839  | -2.237146 | 1.128717  | N        | -2.749939 | 1.209844  | -0.475079 |
| C        | -1.293465 | -0.557592 | 2.435620  | N        | -2.004843 | -1.177563 | -1.361078 |
| N        | -2.407454 | -1.352266 | -0.245063 | C        | -1.440362 | 1.129583  | -0.904255 |
| C        | -2.020875 | 0.942179  | 0.043329  | O        | -0.706147 | 2.134892  | -0.964895 |
| O        | -1.455708 | 2.020624  | 0.103459  | C        | -3.327923 | 2.462699  | 0.034453  |
| H        | -0.876898 | 0.317545  | -2.105727 | H        | -2.542353 | 3.040438  | 0.525541  |
| H        | -0.325433 | -1.341143 | -1.813720 | H        | -3.699920 | 3.044870  | -0.813817 |
| H        | 0.354448  | 1.239179  | 1.173309  | C        | -4.449500 | 1.976423  | 0.968984  |
| H        | 2.442687  | -0.866426 | 1.937720  | H        | -4.078972 | 1.934245  | 1.997268  |
| H        | 2.442963  | 0.963765  | 2.224118  | H        | -5.312127 | 2.643694  | 0.952916  |
| H        | 4.808639  | 1.348216  | 1.400957  | O        | -4.065219 | -2.077557 | -0.876029 |
| H        | 5.391765  | 1.396625  | -0.259428 | C        | 1.228157  | -0.539727 | -0.151960 |
| H        | 0.636386  | 2.116200  | -1.081093 | C        | 2.988148  | 0.974920  | 0.070868  |
| H        | 4.014452  | -2.363350 | -0.259406 | C        | 3.626296  | -0.246932 | -0.187940 |
| H        | 4.904489  | -1.469313 | -1.500161 | C        | 3.747921  | 2.145535  | 0.211076  |
| H        | 4.965713  | -1.057026 | 1.519118  | C        | 5.015446  | -0.346361 | -0.288775 |
| H        | 6.285601  | -0.792652 | 0.375700  | C        | 5.127729  | 2.036233  | 0.106264  |
| H        | -5.044162 | -2.286744 | -0.664312 | H        | 3.270014  | 3.101278  | 0.399101  |
| H        | -4.380451 | 2.604134  | 0.203759  | C        | 5.770721  | 0.805942  | -0.133173 |
| H        | -6.976005 | -0.747253 | -0.564862 | H        | 5.732491  | 2.932015  | 0.214370  |
| H        | -6.688550 | 1.665441  | -0.121391 | C        | 0.402936  | -1.174125 | 1.023805  |
| H        | -0.852905 | -2.894279 | 1.232771  | C        | 1.228203  | -1.080507 | 2.322656  |
| H        | 0.547721  | -2.492476 | 0.208657  | H        | 2.129891  | -1.698935 | 2.247031  |
| H        | 0.678854  | -2.442231 | 1.975586  | H        | 1.526367  | -0.049678 | 2.527849  |
| H        | -1.539146 | 0.498986  | 2.584127  | H        | 0.634281  | -1.448756 | 3.163639  |
| H        | -2.224905 | -1.129208 | 2.359712  | C        | 0.061636  | -2.650252 | 0.788533  |
| H        | -0.744463 | -0.901280 | 3.316739  | H        | -0.621202 | -2.810950 | -0.048318 |
| H        | -2.276043 | -2.226572 | -0.732576 | H        | 0.966100  | -3.230094 | 0.599835  |
|          |           |           |           | H        | -0.426177 | -3.050692 | 1.682309  |
| TS47-RRS |           |           |           | H        | 5.472889  | -1.309544 | -0.494326 |
|          |           |           |           | H        | 6.852157  | 0.769383  | -0.202501 |
| C        | 0.383228  | -0.580237 | -1.445949 | N        | 1.619506  | 0.836749  | 0.175018  |
| H        | 0.443065  | -1.589757 | -1.866530 | H        | 1.014780  | 1.583599  | -0.168563 |
| H        | 0.803787  | 0.125416  | -2.170597 | C        | 2.583899  | -1.251435 | -0.389112 |
| C        | -0.842635 | -0.312574 | 1.198081  | O        | 2.699817  | -2.417138 | -0.715714 |
| C        | -1.036812 | -0.231396 | -1.128695 | H        | -0.595652 | 0.732051  | 1.398024  |
| C        | -2.105428 | -0.724345 | 1.574668  | H        | -1.728754 | -2.080583 | -1.732050 |
| H        | -2.722172 | -0.069313 | 2.181888  |          |           |           |           |
| H        | -2.388167 | -1.774063 | 1.581691  | TS47-SSR |           |           |           |
| C        | -3.493092 | 0.118817  | -0.140348 |          |           |           |           |
| C        | -3.273017 | -1.138742 | -0.813134 | C        | -0.499785 | -0.284093 | -1.344639 |
| C        | -4.784831 | 0.555473  | 0.474039  | H        | -0.914977 | 0.598790  | -1.842782 |

|   |           |           |           |          |           |           |           |
|---|-----------|-----------|-----------|----------|-----------|-----------|-----------|
| H | -0.633985 | -1.141471 | -2.015208 | H        | -2.440497 | -2.065031 | -1.026680 |
| C | 0.877928  | -0.445461 | 1.226495  | C        | -1.895067 | 0.777292  | 0.498158  |
| C | 0.955627  | -0.083474 | -1.091070 | O        | -1.288715 | 1.642158  | 1.087260  |
| C | 2.130017  | -0.934678 | 1.505052  | H        | 1.453984  | -1.935681 | -1.864554 |
| H | 2.385341  | -1.986702 | 1.409575  |          |           |           |           |
| H | 2.828832  | -0.329074 | 2.073159  | TS47-SSS |           |           |           |
| C | 3.519877  | 0.000223  | -0.308181 |          |           |           |           |
| C | 3.126108  | -1.193625 | -1.006620 | C        | 0.317150  | -0.497221 | -1.408974 |
| C | 4.874895  | 0.283630  | 0.255634  | C        | -0.670630 | 0.391588  | 1.140491  |
| H | 5.609526  | 0.287326  | -0.560080 | C        | -1.059973 | -0.011643 | -1.089634 |
| H | 5.186001  | -0.487069 | 0.964507  | C        | -1.914122 | 0.378342  | 1.727531  |
| N | 2.832126  | 1.155601  | -0.471147 | C        | -3.385329 | 0.821140  | -0.088366 |
| N | 1.823428  | -1.085635 | -1.453756 | C        | -2.525263 | 1.857039  | -0.622420 |
| C | 1.494801  | 1.232184  | -0.851252 | C        | -4.741729 | 1.045485  | 0.501509  |
| O | 0.884365  | 2.300694  | -0.883095 | N        | -3.302441 | -0.443015 | -0.583639 |
| C | 3.546961  | 2.320416  | 0.068622  | N        | -1.427971 | 1.315302  | -1.260513 |
| H | 3.907133  | 2.927596  | -0.767698 | C        | -2.128011 | -0.993190 | -1.051371 |
| H | 2.847564  | 2.924282  | 0.650252  | O        | -2.038223 | -2.198719 | -1.312607 |
| C | 4.684376  | 1.679735  | 0.882428  | C        | -4.466152 | -1.266136 | -0.229808 |
| H | 5.593736  | 2.281624  | 0.859429  | C        | -5.214546 | -0.392714 | 0.793056  |
| H | 4.375758  | 1.578237  | 1.926926  | O        | -2.706810 | 3.070062  | -0.492209 |
| O | 3.820141  | -2.198136 | -1.191432 | C        | 1.266723  | -0.327135 | -0.196946 |
| C | -1.296269 | -0.568223 | -0.024774 | C        | 3.268443  | 0.900153  | -0.125491 |
| C | -3.620100 | -0.509423 | -0.361613 | C        | 3.688890  | -0.426340 | -0.263120 |
| C | -3.323981 | 0.756130  | 0.152424  | C        | 4.206862  | 1.924400  | 0.038353  |
| C | -4.915920 | -0.812954 | -0.789220 | C        | 5.039936  | -0.770845 | -0.270221 |
| C | -4.299266 | 1.742138  | 0.281295  | C        | 5.551971  | 1.571639  | 0.044174  |
| C | -5.882117 | 0.181566  | -0.671132 | C        | 5.977873  | 0.241140  | -0.114499 |
| H | -5.163058 | -1.790252 | -1.191647 | C        | 0.477411  | -0.606092 | 1.136332  |
| C | -5.591072 | 1.448644  | -0.138576 | C        | 1.371808  | -0.307765 | 2.357622  |
| H | -6.895176 | -0.032390 | -0.998815 | C        | 0.002515  | -2.059074 | 1.237056  |
| C | -0.393479 | -1.267320 | 1.037761  | N        | 1.884463  | 1.014376  | -0.206762 |
| H | 0.669958  | 0.586035  | 1.506259  | C        | 2.488616  | -1.263480 | -0.365521 |
| C | -0.125670 | -2.723222 | 0.636149  | O        | 2.413944  | -2.456791 | -0.565878 |
| H | -1.069853 | -3.273769 | 0.596524  | H        | 0.241273  | -1.560843 | -1.654225 |
| H | 0.376984  | -2.829044 | -0.328351 | H        | 0.751353  | 0.028547  | -2.265934 |
| H | 0.505586  | -3.210346 | 1.383936  | H        | -0.327014 | 1.412846  | 0.957747  |
| C | -1.138440 | -1.292391 | 2.388624  | H        | -2.324312 | 1.296302  | 2.137181  |
| H | -1.256019 | -0.287351 | 2.800892  | H        | -2.377864 | -0.553683 | 2.046210  |
| H | -2.129133 | -1.742947 | 2.260404  | H        | -5.374555 | 1.552060  | -0.238838 |
| H | -0.572544 | -1.890407 | 3.108285  | H        | -4.703639 | 1.688595  | 1.383316  |
| H | -4.033149 | 2.712025  | 0.690353  | H        | -0.711978 | 1.983691  | -1.530385 |
| H | -6.376069 | 2.192653  | -0.062046 | H        | -5.047144 | -1.456482 | -1.137276 |
| N | -2.506816 | -1.339583 | -0.324797 | H        | -4.114940 | -2.226376 | 0.154103  |

|           |           |           |           |          |           |           |           |
|-----------|-----------|-----------|-----------|----------|-----------|-----------|-----------|
| H         | -6.296367 | -0.506181 | 0.712274  | H        | -0.767200 | 1.024710  | 2.450444  |
| H         | -4.921890 | -0.678411 | 1.807303  | H        | -3.931672 | 0.575877  | 1.441307  |
| H         | 3.897439  | 2.958936  | 0.149245  | H        | -4.930425 | -1.324680 | 2.591892  |
| H         | 5.330301  | -1.810685 | -0.386130 | H        | -4.619978 | -2.420271 | 1.132465  |
| H         | 6.296914  | 2.351700  | 0.170556  | H        | 4.375964  | -2.555300 | 0.010656  |
| H         | 7.037728  | 0.012305  | -0.110432 | H        | 3.892545  | 1.311556  | 0.884112  |
| H         | 2.262674  | -0.944974 | 2.348836  | H        | 4.481773  | -0.068156 | 1.834085  |
| H         | 1.699530  | 0.735324  | 2.400646  | H        | 4.392504  | 0.242345  | -1.200856 |
| H         | 0.810567  | -0.518217 | 3.271983  | H        | 5.680717  | -0.518535 | -0.244803 |
| H         | -0.562526 | -2.390983 | 0.365100  | H        | 1.173226  | -0.082529 | -2.845606 |
| H         | 0.855960  | -2.729651 | 1.357094  | H        | 0.482687  | 3.437123  | 0.650664  |
| H         | -0.633033 | -2.161758 | 2.123245  | H        | 2.904197  | 1.697819  | -2.473573 |
| H         | 1.467212  | 1.739116  | 0.361819  | H        | 2.558810  | 3.436999  | -0.753061 |
|           |           |           |           | H        | -2.846725 | -2.466713 | -0.549673 |
| TS54-base |           |           |           | H        | -4.504131 | -2.177407 | -1.148224 |
|           |           |           |           | H        | -3.090459 | -1.714423 | -2.131307 |
| C         | -0.913762 | 0.210731  | 1.747285  | H        | -4.337596 | 1.575639  | -0.842465 |
| C         | -4.004605 | -0.393256 | 0.947071  | H        | -4.031542 | 0.623688  | -2.317119 |
| C         | 0.278663  | -0.467132 | 1.336166  | H        | -5.414716 | 0.212804  | -1.263902 |
| C         | -4.550628 | -1.432736 | 1.579943  | H        | 3.773202  | -2.049042 | -1.573137 |
| C         | 2.523671  | -1.460845 | 0.088576  | H        | 0.180972  | -3.244136 | -0.887608 |
| C         | 1.314112  | -2.063958 | 0.009844  |          |           |           |           |
| C         | 3.860981  | -1.746827 | -0.526182 | TS54-neu |           |           |           |
| N         | 2.618960  | -0.340446 | 0.903861  | C        | -1.304255 | 2.559938  | 1.980343  |
| N         | 0.213219  | -1.587115 | 0.634370  | C        | -0.597851 | 1.367917  | 2.166037  |
| C         | 1.579050  | 0.217654  | 1.591553  | C        | 0.383937  | 1.087915  | 1.228800  |
| O         | 1.741310  | 1.179918  | 2.346608  | C        | 0.664016  | 1.892984  | 0.129948  |
| C         | 3.963600  | 0.221852  | 0.910645  | C        | -0.043154 | 3.070293  | -0.042671 |
| C         | 4.598490  | -0.402423 | -0.342095 | C        | -1.021344 | 3.402076  | 0.899763  |
| O         | 1.138890  | -3.182358 | -0.760515 | H        | -2.075170 | 2.838681  | 2.691648  |
| C         | -2.087645 | 0.220084  | -0.543350 | H        | -0.801706 | 0.707907  | 3.004366  |
| C         | -0.133052 | 0.742085  | -1.344112 | H        | 0.155386  | 3.701161  | -0.903180 |
| C         | -0.324309 | 1.721479  | -0.356404 | H        | -1.584635 | 4.322481  | 0.784843  |
| C         | 1.031524  | 0.698369  | -2.102926 | C        | 1.664840  | 1.168417  | -0.786953 |
| C         | 0.629048  | 2.698925  | -0.132352 | C        | 2.023887  | -0.023982 | 0.120495  |
| C         | 1.993742  | 1.689019  | -1.878619 | N        | 1.261808  | -0.031652 | 1.180341  |
| C         | 1.795098  | 2.679124  | -0.909123 | H        | 1.252718  | -0.780678 | 1.865482  |
| C         | -3.474960 | -0.392331 | -0.472599 | O        | 2.614780  | 1.780885  | -1.410749 |
| C         | -3.484071 | -1.778330 | -1.114750 | C        | 3.155317  | -0.987714 | -0.071341 |
| C         | -4.379810 | 0.573572  | -1.280216 | C        | 2.978619  | -2.244157 | 0.782513  |
| N         | -1.228778 | -0.146934 | -1.441416 | H        | 2.040610  | -2.744987 | 0.519592  |
| C         | -1.638797 | 1.396339  | 0.313819  | H        | 3.803099  | -2.935800 | 0.590237  |
| O         | -2.422471 | 2.233298  | 0.848581  | H        | 2.986168  | -2.028567 | 1.857643  |
| H         | -1.765838 | -0.431144 | 1.947567  |          |           |           |           |



|             |           |           |           |             |           |           |           |
|-------------|-----------|-----------|-----------|-------------|-----------|-----------|-----------|
| C           | 3.313198  | -1.376590 | -1.554317 | C           | -3.100328 | 0.608185  | -0.047304 |
| H           | 3.402066  | -0.479447 | -2.172254 | H           | -4.688057 | -2.256895 | -0.995235 |
| H           | 4.225031  | -1.971984 | -1.652355 | H           | -6.429095 | -0.555946 | -1.586490 |
| H           | 2.461333  | -1.979497 | -1.882582 | H           | -6.028765 | 1.842238  | -1.182183 |
| C           | 4.366271  | -0.136449 | 0.313373  | H           | -3.868752 | 2.617157  | -0.195448 |
| H           | 4.453885  | 0.777090  | -0.275573 | N           | -2.244715 | -1.560090 | 0.170735  |
| C           | 5.251925  | -0.451852 | 1.256634  | H           | -0.889038 | 2.591350  | -0.110639 |
| H           | 6.103327  | 0.193909  | 1.445229  | C           | -0.519037 | -1.694416 | 2.730001  |
| H           | 5.176770  | -1.353027 | 1.858497  | H           | 0.344994  | -2.090427 | 3.272784  |
| C           | 0.609302  | 0.418338  | -1.880280 | H           | -1.292611 | -2.465423 | 2.668273  |
| H           | 0.291474  | 1.278736  | -2.469487 | H           | -0.910765 | -0.839514 | 3.289435  |
| H           | 1.236243  | -0.239960 | -2.476691 | C           | 0.450610  | -2.520367 | 0.581995  |
| C           | -0.545027 | -0.295028 | -1.289571 | H           | -0.361191 | -3.242382 | 0.472679  |
| C           | -1.850758 | 0.409077  | -1.257305 | H           | 1.251419  | -2.984581 | 1.166095  |
| C           | -1.358200 | -2.057824 | -0.027996 | H           | 0.813213  | -2.283859 | -0.420513 |
| C           | -2.585430 | -1.488150 | 0.089969  | C           | 2.315649  | -0.380683 | 1.546429  |
| N           | -0.358583 | -1.458232 | -0.720190 | H           | 2.929082  | 0.239842  | 2.193212  |
| N           | -2.804288 | -0.290398 | -0.557280 | H           | 2.715138  | -1.370616 | 1.341622  |
| O           | -0.988280 | -3.232604 | 0.572931  | H           | 0.560469  | 0.694588  | 2.023123  |
| O           | -2.096172 | 1.486730  | -1.790664 | O           | -1.669173 | 1.353227  | 1.808211  |
| C           | -4.155396 | 0.225036  | -0.337296 | H           | -2.413014 | 1.023379  | 2.328566  |
| H           | -4.532982 | 0.661097  | -1.263188 | C           | 0.679642  | 1.168010  | -0.349870 |
| H           | -4.114385 | 1.015076  | 0.421876  | C           | 1.057217  | 0.082976  | -1.280168 |
| C           | -3.835501 | -1.884954 | 0.828617  | C           | 3.209435  | 0.425876  | -0.290508 |
| H           | -4.055303 | -2.954678 | 0.761054  | N           | 2.396311  | -0.190637 | -1.224378 |
| H           | -3.744731 | -1.627046 | 1.891668  | N           | 1.579733  | 2.106504  | 0.025587  |
| C           | -4.913366 | -1.021487 | 0.138066  | C           | 2.831546  | 1.731495  | 0.071376  |
| H           | -5.310472 | -1.558656 | -0.727790 | O           | 3.770525  | 2.535683  | 0.623862  |
| H           | -5.744670 | -0.775901 | 0.800281  | C           | 4.590253  | -0.161695 | -0.395529 |
| H           | -1.765424 | -3.686860 | 0.917472  | H           | 5.213412  | 0.481969  | -1.027850 |
| TS56-DE-RRR |           |           |           | H           | 5.078185  | -0.241773 | 0.578528  |
| C           | 0.945832  | -0.159841 | 1.472924  | C           | 4.318134  | -1.524308 | -1.066267 |
| C           | -0.082966 | -1.275123 | 1.300428  | H           | 5.162152  | -1.876082 | -1.661240 |
| C           | -1.338333 | -0.768806 | 0.612838  | H           | 4.106615  | -2.279439 | -0.303256 |
| C           | -1.707977 | 0.728841  | 0.526618  | C           | 3.062656  | -1.290045 | -1.922948 |
| C           | -0.777822 | 1.541650  | -0.395081 | H           | 2.392191  | -2.149529 | -1.986971 |
| H           | -1.119960 | 1.401664  | -1.425125 | H           | 3.305837  | -0.971604 | -2.942355 |
| C           | -3.333889 | -0.753158 | -0.266803 | H           | 3.309414  | 3.313710  | 0.969718  |
| C           | -4.522092 | -1.198617 | -0.823763 | O           | 0.276709  | -0.525798 | -2.011955 |
| C           | -5.486943 | -0.238468 | -1.150516 | TS56-DE-RRS |           |           |           |
| C           | -5.261197 | 1.119894  | -0.923653 | C           | 0.359671  | 1.872939  | -0.492033 |
| C           | -4.051169 | 1.559739  | -0.368747 | C           | 1.607120  | 1.030726  | -0.306213 |

|   |           |           |           |             |           |           |           |
|---|-----------|-----------|-----------|-------------|-----------|-----------|-----------|
| C | 1.718606  | -0.154204 | 0.684374  | H           | -3.803961 | -0.959792 | -2.355835 |
| C | 0.753713  | -1.262145 | 0.230568  | H           | -3.976589 | -2.562919 | -1.620752 |
| H | 0.987800  | -1.568568 | -0.792799 | H           | -2.164991 | 0.947631  | 3.125077  |
| C | 3.633441  | 0.261327  | -0.593229 | O           | -1.239089 | -2.329765 | -1.536605 |
| C | 4.922418  | 0.122062  | -1.083713 |             |           |           |           |
| C | 5.730440  | -0.863590 | -0.506244 | TS56-DE-SSR |           |           |           |
| C | 5.253813  | -1.673235 | 0.526586  |             |           |           |           |
| C | 3.945810  | -1.525732 | 1.007436  | C           | 0.675135  | -0.602450 | 0.724516  |
| C | 3.149598  | -0.555433 | 0.428951  | C           | 0.867351  | 0.813208  | -1.076116 |
| H | 5.283294  | 0.763080  | -1.881237 | C           | -0.338372 | 1.724635  | -0.852883 |
| H | 6.747041  | -0.997698 | -0.862620 | C           | -1.581098 | 0.951535  | -0.449319 |
| H | 5.905599  | -2.423507 | 0.962748  | C           | -1.654375 | -0.583216 | -0.336725 |
| H | 3.573784  | -2.146124 | 1.818015  | C           | -0.775187 | -0.987625 | 0.864375  |
| N | 2.661112  | 1.212904  | -1.016251 | H           | -1.167262 | -0.507457 | 1.764294  |
| H | 0.907417  | -2.140054 | 0.873295  | C           | -3.641084 | 0.550092  | 0.152416  |
| C | 0.040982  | 2.634154  | 0.810429  | C           | -4.963649 | 0.757284  | 0.512656  |
| H | -0.686089 | 3.427675  | 0.613390  | C           | -5.762558 | -0.372606 | 0.721596  |
| H | 0.952228  | 3.100846  | 1.193965  | C           | -5.244331 | -1.660221 | 0.572036  |
| H | -0.356963 | 1.984743  | 1.590954  | C           | -3.902419 | -1.855137 | 0.217169  |
| C | 0.622285  | 2.914138  | -1.598022 | C           | -3.115972 | -0.736896 | 0.015140  |
| H | 1.464886  | 3.553510  | -1.321212 | H           | -5.356896 | 1.763015  | 0.618390  |
| H | -0.272260 | 3.528875  | -1.733068 | H           | -6.804833 | -0.246396 | 0.997819  |
| H | 0.872591  | 2.430720  | -2.544993 | H           | -5.889238 | -2.518880 | 0.729715  |
| O | 1.538429  | 0.184635  | 2.042394  | H           | -3.497985 | -2.855930 | 0.091157  |
| H | 0.590762  | 0.106973  | 2.239218  | N           | -2.670296 | 1.552599  | -0.134959 |
| C | -0.809112 | 1.005475  | -0.986074 | H           | -0.854251 | -2.076589 | 0.984910  |
| C | -2.129256 | 1.416503  | -0.832836 | C           | -0.656191 | 2.367287  | -2.227211 |
| H | -2.842911 | 1.189647  | -1.619817 | H           | 0.203254  | 2.952051  | -2.569726 |
| H | -2.373302 | 2.283914  | -0.224573 | H           | -1.526923 | 3.021247  | -2.128729 |
| H | -0.567657 | 0.428830  | -1.880484 | H           | -0.879889 | 1.598450  | -2.972959 |
| C | -0.692852 | -0.852351 | 0.288059  | C           | 1.519447  | -1.525427 | -0.044856 |
| C | -1.593224 | -1.548125 | -0.659212 | C           | -0.079769 | 2.841776  | 0.168490  |
| C | -3.227261 | -0.104644 | 0.340436  | H           | -0.997854 | 3.417565  | 0.300974  |
| N | -2.899491 | -1.177259 | -0.475272 | H           | 0.704095  | 3.518205  | -0.185287 |
| N | -1.165264 | -0.341427 | 1.453786  | H           | 0.211459  | 2.429071  | 1.138672  |
| C | -2.408481 | 0.073897  | 1.465166  | C           | 3.214331  | 0.071074  | 0.476868  |
| O | -2.890490 | 0.792647  | 2.503999  | N           | 2.836686  | -1.178571 | -0.003901 |
| C | -4.698201 | 0.196634  | 0.194874  | N           | 1.193013  | 0.199738  | 1.687366  |
| H | -5.186789 | 0.268496  | 1.168830  | C           | 2.442075  | 0.553344  | 1.552401  |
| H | -4.838257 | 1.155853  | -0.314981 | O           | 2.980435  | 1.499573  | 2.352680  |
| C | -5.213743 | -0.985375 | -0.659673 | C           | 2.184526  | 1.261815  | -0.976237 |
| H | -5.589211 | -1.776577 | -0.005304 | H           | 2.903605  | 0.889500  | -1.701458 |
| H | -6.017211 | -0.694391 | -1.337764 | H           | 2.410984  | 2.247896  | -0.578297 |
| C | -3.974851 | -1.493156 | -1.410329 | C           | 4.695250  | 0.257959  | 0.244524  |

|             |           |           |           |          |           |           |           |
|-------------|-----------|-----------|-----------|----------|-----------|-----------|-----------|
| H           | 5.205894  | 0.527652  | 1.171517  | N        | 2.748045  | -0.665410 | -0.728623 |
| H           | 4.868665  | 1.067184  | -0.471878 | N        | 1.276229  | -1.473659 | 1.416313  |
| C           | 5.144091  | -1.114005 | -0.314286 | C        | 2.534435  | -1.157012 | 1.558993  |
| H           | 5.533432  | -1.733170 | 0.498091  | O        | 3.169815  | -1.349764 | 2.737529  |
| H           | 5.921156  | -1.023620 | -1.074599 | C        | 4.666874  | -0.063382 | 0.474315  |
| C           | 3.863012  | -1.752660 | -0.868916 | H        | 5.287058  | -0.951054 | 0.646243  |
| H           | 3.661696  | -1.464534 | -1.910054 | H        | 4.936788  | 0.679202  | 1.228398  |
| H           | 3.832475  | -2.840527 | -0.805472 | C        | 4.797902  | 0.453534  | -0.974075 |
| H           | 0.677639  | 0.028981  | -1.805811 | H        | 5.794948  | 0.293578  | -1.386322 |
| H           | 2.274033  | 1.824336  | 2.930102  | H        | 4.591023  | 1.526751  | -1.005562 |
| O           | -1.292408 | -1.246197 | -1.524263 | C        | 3.719132  | -0.307544 | -1.765330 |
| H           | -0.590810 | -1.897707 | -1.339029 | H        | 3.222451  | 0.284908  | -2.537042 |
| O           | 1.099531  | -2.490291 | -0.700381 | H        | 4.099082  | -1.223121 | -2.229120 |
| TS56-DE-SSS |           |           |           | H        | 2.517235  | -1.694514 | 3.364431  |
| C           | 0.661951  | -1.076324 | 0.272426  | O        | -1.536675 | -0.420777 | -2.016704 |
| C           | -0.214505 | 1.866689  | -0.054919 | H        | -0.634091 | -0.737706 | -2.227595 |
| C           | -1.516088 | 1.083462  | -0.048081 | O        | 1.023168  | -1.145672 | -2.121164 |
| C           | -1.689994 | -0.348949 | -0.623381 | C        | 0.748629  | 1.146367  | 0.892797  |
| C           | -0.816151 | -1.364454 | 0.157527  | C        | 2.104707  | 1.414395  | 0.998202  |
| H           | -1.201139 | -1.444568 | 1.178276  | H        | 2.573941  | 1.449367  | 1.977019  |
| C           | -3.586433 | 0.554656  | 0.423415  | H        | 2.599847  | 1.993577  | 0.220981  |
| C           | -4.884132 | 0.650697  | 0.901595  | H        | 0.257194  | 0.823490  | 1.810988  |
| C           | -5.744187 | -0.425831 | 0.657509  | TS56-RRR |           |           |           |
| C           | -5.308886 | -1.549816 | -0.047137 | C        | 3.113844  | -0.619581 | -0.016317 |
| C           | -3.992617 | -1.633238 | -0.521275 | C        | 3.389412  | 0.722383  | -0.294468 |
| C           | -3.143830 | -0.572853 | -0.266129 | C        | 4.605225  | 1.109256  | -0.835460 |
| H           | -5.212644 | 1.535797  | 1.436432  | C        | 5.553224  | 0.109609  | -1.083230 |
| H           | -6.768821 | -0.383356 | 1.013702  | C        | 5.284722  | -1.229700 | -0.797097 |
| H           | -6.000368 | -2.365368 | -0.234050 | C        | 4.046492  | -1.610934 | -0.261586 |
| H           | -3.654528 | -2.498099 | -1.085409 | C        | 1.696085  | -0.677611 | 0.499334  |
| N           | -2.564627 | 1.540893  | 0.534746  | C        | 1.369988  | 0.838142  | 0.535451  |
| H           | -0.958461 | -2.341602 | -0.326694 | N        | 2.312265  | 1.576099  | 0.074667  |
| C           | 0.337132  | 2.057762  | -1.476577 | C        | 0.798753  | -1.450846 | -0.487928 |
| H           | 1.232507  | 2.688491  | -1.443502 | C        | 0.131107  | 1.442273  | 1.179636  |
| H           | -0.408572 | 2.572632  | -2.088751 | C        | 0.604394  | 1.995378  | 2.551793  |
| H           | 0.583107  | 1.122721  | -1.978170 | C        | -0.393402 | 2.614087  | 0.341082  |
| C           | 1.448489  | -0.977984 | -0.964443 | C        | -0.920604 | 0.388356  | 1.487414  |
| C           | -0.463373 | 3.260761  | 0.555086  | C        | -0.661626 | -1.138314 | -0.395292 |
| H           | -1.227648 | 3.792197  | -0.018509 | C        | -2.273782 | 0.604535  | 1.563528  |
| H           | 0.470197  | 3.831004  | 0.535005  | C        | -3.272232 | -0.533987 | -0.234572 |
| H           | -0.815997 | 3.186744  | 1.585976  | C        | -2.871175 | -1.774352 | 0.388990  |
| C           | 3.215761  | -0.448294 | 0.550969  | C        | -4.675026 | -0.019682 | -0.307561 |

|          |           |           |           |          |           |           |           |
|----------|-----------|-----------|-----------|----------|-----------|-----------|-----------|
| N        | -2.524376 | 0.016143  | -1.222889 | C        | 0.326983  | 1.898882  | -0.443730 |
| N        | -1.533704 | -2.036212 | 0.167957  | C        | 0.022868  | 2.600018  | 0.897358  |
| C        | -1.159793 | -0.165143 | -1.333306 | C        | 0.615866  | 2.992527  | -1.493453 |
| O        | -0.470136 | 0.484753  | -2.132122 | C        | -0.868680 | 1.102318  | -0.980484 |
| C        | -3.248964 | 1.049281  | -1.975209 | C        | -0.699322 | -0.945495 | 0.318703  |
| C        | -4.510544 | 1.277705  | -1.124750 | C        | -2.165179 | 1.491938  | -0.741628 |
| O        | -3.597348 | -2.494057 | 1.077777  | C        | -3.283426 | -0.236083 | 0.441655  |
| O        | 1.556150  | -1.318619 | 1.761054  | C        | -2.488463 | 0.077707  | 1.599897  |
| H        | 4.805263  | 2.153153  | -1.052315 | C        | -4.747119 | 0.032715  | 0.299932  |
| H        | 6.516837  | 0.380957  | -1.502888 | N        | -2.901338 | -1.214437 | -0.421185 |
| H        | 6.040940  | -1.982769 | -0.993397 | N        | -1.215713 | -0.441018 | 1.481201  |
| H        | 3.831840  | -2.653695 | -0.042041 | C        | -1.584060 | -1.568970 | -0.637073 |
| H        | 1.114675  | -1.192909 | -1.503239 | O        | -1.243686 | -2.286475 | -1.586318 |
| H        | 0.989588  | -2.516175 | -0.313863 | C        | -3.968420 | -1.598129 | -1.354494 |
| H        | 1.394107  | 2.735919  | 2.397700  | C        | -5.070007 | -0.553920 | -1.090595 |
| H        | -0.240620 | 2.462394  | 3.066395  | O        | -2.856315 | 0.747859  | 2.569423  |
| H        | 0.990243  | 1.194060  | 3.190983  | O        | 1.448014  | 0.120122  | 2.020047  |
| H        | 0.423939  | 3.313167  | 0.152006  | H        | 5.243640  | 0.844124  | -1.899952 |
| H        | -0.769240 | 2.275736  | -0.627352 | H        | 6.732288  | -0.926586 | -0.937067 |
| H        | -1.182983 | 3.142404  | 0.884513  | H        | 5.915704  | -2.419901 | 0.844291  |
| H        | -0.532666 | -0.462796 | 2.041026  | H        | 3.583687  | -2.204981 | 1.710774  |
| H        | -2.888962 | -0.001184 | 2.222287  | H        | 0.959237  | -1.633241 | -0.766614 |
| H        | -2.707724 | 1.543066  | 1.226561  | H        | 0.954276  | -2.166204 | 0.915153  |
| H        | -5.303394 | -0.760957 | -0.817736 | H        | 0.942675  | 3.032226  | 1.305045  |
| H        | -5.101157 | 0.131694  | 0.686911  | H        | -0.673722 | 3.425984  | 0.730396  |
| H        | -2.607909 | 1.925599  | -2.088151 | H        | -0.414461 | 1.941214  | 1.648632  |
| H        | -3.469666 | 0.659831  | -2.973956 | H        | 1.471569  | 3.599902  | -1.185585 |
| H        | -4.350729 | 2.123577  | -0.450201 | H        | 0.852273  | 2.555678  | -2.466221 |
| H        | -5.382289 | 1.501666  | -1.740875 | H        | -0.266700 | 3.629708  | -1.591800 |
| H        | 2.260627  | -1.010538 | 2.345442  | H        | -0.655380 | 0.535082  | -1.887489 |
| H        | -1.155926 | -2.816158 | 0.697659  | H        | -2.402240 | 2.276955  | -0.028693 |
|          |           |           |           | H        | -2.934905 | 1.261709  | -1.470983 |
| TS56-RRS |           |           |           | H        | -5.286109 | -0.476922 | 1.108509  |
|          |           |           |           | H        | -4.968110 | 1.098801  | 0.392629  |
| C        | 3.138634  | -0.563772 | 0.382337  | H        | -3.566102 | -1.589733 | -2.369970 |
| C        | 3.606393  | 0.288184  | -0.618856 | H        | -4.280684 | -2.621109 | -1.124910 |
| C        | 4.894615  | 0.178296  | -1.117844 | H        | -5.024729 | 0.233075  | -1.848076 |
| C        | 5.716305  | -0.814505 | -0.571914 | H        | -6.065890 | -0.996548 | -1.135746 |
| C        | 5.254696  | -1.661927 | 0.436888  | H        | 2.112025  | 0.742579  | 2.342202  |
| C        | 3.946500  | -1.546124 | 0.926281  | H        | -0.555507 | -0.175905 | 2.209765  |
| C        | 1.704525  | -0.179851 | 0.651617  |          |           |           |           |
| C        | 1.565751  | 1.030549  | -0.307609 | TS56-SSR |           |           |           |
| N        | 2.621674  | 1.240101  | -1.008838 |          |           |           |           |
| C        | 0.749988  | -1.309438 | 0.256720  | C        | -3.582489 | 0.563205  | 0.204265  |

|   |           |           |           |          |           |           |           |
|---|-----------|-----------|-----------|----------|-----------|-----------|-----------|
| C | -3.099744 | -0.723711 | -0.044087 | H        | 3.485160  | -2.122914 | -1.657474 |
| C | -1.522595 | 0.953996  | -0.416208 | H        | 5.011408  | -0.287900 | -1.669891 |
| C | -1.633228 | -0.584355 | -0.378912 | H        | 6.002035  | -1.278911 | -0.603187 |
| N | -2.589902 | 1.556993  | -0.033114 | H        | 5.217464  | -0.096295 | 1.369239  |
| O | -1.249977 | -1.221129 | -1.567650 | H        | 4.960843  | 1.205715  | 0.212861  |
| C | -0.301291 | 1.731549  | -0.878291 |          |           |           |           |
| C | 0.925828  | 0.861321  | -1.131987 | TS56-SSS |           |           |           |
| H | 0.766802  | 0.068350  | -1.859561 |          |           |           |           |
| C | 0.645005  | -0.694022 | 0.747234  | C        | -3.576172 | 0.559325  | 0.389635  |
| C | -0.803431 | -1.061321 | 0.838532  | C        | -3.129203 | -0.600323 | -0.240322 |
| H | -1.246125 | -0.635600 | 1.744812  | C        | -1.510226 | 1.081379  | -0.122551 |
| H | -0.894494 | -2.153922 | 0.893947  | C        | -1.675304 | -0.390158 | -0.606194 |
| C | 2.216117  | 1.313631  | -0.945395 | N        | -2.563264 | 1.558784  | 0.436252  |
| H | 3.003438  | 0.927772  | -1.585891 | O        | -1.503753 | -0.567948 | -1.982548 |
| H | 2.422862  | 2.266246  | -0.465572 | C        | -0.231317 | 1.901777  | -0.204491 |
| C | 1.511297  | -1.552754 | -0.001821 | C        | 0.757050  | 1.320849  | 0.803399  |
| O | 1.126508  | -2.487105 | -0.737475 | H        | 0.281307  | 1.041660  | 1.745565  |
| N | 2.835078  | -1.200918 | 0.107125  | C        | 0.657108  | -1.080037 | 0.329571  |
| N | 1.171664  | 0.141121  | 1.699881  | C        | -0.817413 | -1.362478 | 0.255593  |
| C | 2.457334  | 0.640380  | 1.662298  | H        | -1.226024 | -1.349618 | 1.272612  |
| O | 2.853453  | 1.542308  | 2.399121  | H        | -0.983633 | -2.369056 | -0.155210 |
| C | 3.231314  | -0.005207 | 0.624714  | C        | 2.104844  | 1.571985  | 0.861253  |
| C | 4.705229  | 0.167251  | 0.435631  | H        | 2.614169  | 2.039819  | 0.020708  |
| C | 3.889376  | -1.860106 | -0.677437 | H        | 2.611554  | 1.615006  | 1.820838  |
| C | 5.021223  | -0.814669 | -0.712261 | C        | 1.450982  | -1.073466 | -0.861702 |
| C | -4.892116 | 0.779003  | 0.604631  | O        | 1.045362  | -1.251790 | -2.034181 |
| C | -5.720812 | -0.340958 | 0.737422  | N        | 2.771426  | -0.785683 | -0.621777 |
| C | -3.913849 | -1.832724 | 0.086135  | N        | 1.305771  | -1.330620 | 1.522884  |
| C | -5.244193 | -1.627112 | 0.476951  | C        | 2.604115  | -0.951018 | 1.790951  |
| H | -3.540217 | -2.831027 | -0.125122 | O        | 3.103753  | -0.979979 | 2.914619  |
| H | -5.913113 | -2.476097 | 0.574996  | C        | 3.260795  | -0.461967 | 0.597171  |
| H | -6.754705 | -0.207252 | 1.039968  | C        | 4.705004  | -0.089642 | 0.489209  |
| H | -5.254077 | 1.784006  | 0.794909  | C        | 3.731290  | -0.532173 | -1.707607 |
| H | -0.513371 | -1.841686 | -1.399025 | H        | 4.068484  | -1.495501 | -2.101221 |
| C | -0.698076 | 2.308897  | -2.265177 | H        | 3.221370  | 0.003052  | -2.510974 |
| H | -0.963115 | 1.504815  | -2.958293 | C        | 4.845744  | 0.263435  | -1.005520 |
| H | -1.561596 | 2.969271  | -2.147427 | H        | 5.831163  | 0.019977  | -1.404189 |
| H | 0.141093  | 2.873748  | -2.681933 | H        | 4.681043  | 1.334461  | -1.150731 |
| C | -0.020926 | 2.901781  | 0.075996  | H        | 5.318199  | -0.952685 | 0.778237  |
| H | 0.657734  | 3.619860  | -0.393042 | H        | 4.964430  | 0.728254  | 1.165076  |
| H | -0.958866 | 3.410412  | 0.304807  | C        | -4.872681 | 0.672310  | 0.867274  |
| H | 0.437837  | 2.575534  | 1.015391  | C        | -5.725804 | -0.421767 | 0.684700  |
| H | 0.542752  | 0.614159  | 2.341574  | C        | -3.970638 | -1.679354 | -0.435022 |
| H | 4.172668  | -2.785694 | -0.168694 | C        | -5.285844 | -1.578860 | 0.038930  |

|               |           |           |           |              |           |           |           |
|---------------|-----------|-----------|-----------|--------------|-----------|-----------|-----------|
| H             | -3.629615 | -2.569800 | -0.956018 | C            | -5.075943 | -0.842698 | -0.632130 |
| H             | -5.973126 | -2.406774 | -0.103206 | H            | -4.905871 | -0.971331 | -1.706306 |
| H             | -6.749548 | -0.366908 | 1.041498  | H            | -6.143004 | -0.970921 | -0.433531 |
| H             | -5.205780 | 1.583131  | 1.353763  | H            | -4.756475 | 1.325349  | -0.915796 |
| H             | -0.581294 | -0.857901 | -2.165024 | H            | -4.945812 | 0.810255  | 0.783625  |
| C             | 0.322466  | 1.968741  | -1.636209 | C            | 4.338521  | 0.357748  | -1.721687 |
| H             | -0.446866 | 2.358831  | -2.308307 | C            | 5.376341  | -0.550214 | -1.542327 |
| H             | 1.173002  | 2.658211  | -1.667205 | C            | 4.390836  | -1.385946 | 0.513309  |
| H             | 0.640167  | 1.000941  | -2.023547 | C            | 5.412701  | -1.418012 | -0.434136 |
| C             | -0.529967 | 3.340460  | 0.266469  | H            | 4.396789  | -2.042041 | 1.380506  |
| H             | -1.305170 | 3.788138  | -0.361341 | H            | 6.241130  | -2.112336 | -0.322868 |
| H             | -0.888611 | 3.357315  | 1.297589  | H            | 6.181313  | -0.590478 | -2.272730 |
| H             | 0.386030  | 3.933969  | 0.195413  | H            | 4.312641  | 1.028219  | -2.576765 |
| H             | 0.749381  | -1.548275 | 2.343829  | C            | 0.622058  | 2.311925  | 2.149847  |
|               |           |           |           | H            | -0.280772 | 2.778483  | 2.566749  |
| TS67-base-SSR |           |           |           | H            | 1.018011  | 1.577372  | 2.855438  |
|               |           |           |           | H            | 1.368780  | 3.098722  | 1.996422  |
| C             | 3.313053  | 0.405247  | -0.763047 | C            | -0.080503 | 2.753192  | -0.188997 |
| C             | 3.343797  | -0.489195 | 0.332462  | H            | -0.462140 | 2.397501  | -1.147014 |
| C             | 1.512791  | 0.883112  | 0.329294  | H            | -0.819759 | 3.432062  | 0.250268  |
| C             | 2.154517  | -0.172683 | 1.163945  | H            | 0.824254  | 3.327135  | -0.401426 |
| N             | 2.202631  | 1.233345  | -0.760967 | H            | -0.331104 | 0.218154  | -1.978277 |
| O             | 1.943982  | -0.477156 | 2.367294  |              |           |           |           |
| C             | 0.285701  | 1.636819  | 0.803285  | TS67-neu-RRR |           |           |           |
| C             | -0.820632 | 0.565657  | 1.058378  | C            | 0.598679  | 0.820704  | -0.306465 |
| H             | -0.593923 | 0.113261  | 2.030671  | C            | 0.875353  | 0.358467  | 1.165630  |
| C             | -0.649685 | -0.573406 | 0.003414  | C            | -0.034542 | -0.861891 | 1.530533  |
| C             | 0.770913  | -1.073575 | -0.016176 | C            | -1.332648 | -0.572409 | 0.854577  |
| H             | 1.158344  | -1.256698 | -1.020052 | C            | -1.897689 | 0.823955  | 0.772822  |
| H             | 0.869888  | -1.951139 | 0.621641  | C            | -0.868336 | 1.135875  | -0.565705 |
| C             | -2.281647 | 1.077560  | 1.021647  | H            | -1.197171 | 0.654750  | -1.489309 |
| H             | -2.795230 | 0.885010  | 1.969399  | C            | -3.266411 | -0.795718 | -0.295208 |
| H             | -2.339323 | 2.151067  | 0.819816  | C            | -4.311313 | -1.354868 | -1.014360 |
| C             | -1.696960 | -1.676939 | 0.295843  | C            | -5.372124 | -0.503524 | -1.329249 |
| O             | -1.474503 | -2.856797 | 0.510276  | C            | -5.364873 | 0.839140  | -0.932763 |
| N             | -2.937683 | -1.125905 | 0.246427  | C            | -4.286703 | 1.377671  | -0.225495 |
| N             | -1.052593 | -0.023335 | -1.306918 | C            | -3.224208 | 0.543819  | 0.083296  |
| C             | -2.275895 | 0.547494  | -1.392827 | H            | -4.313630 | -2.398328 | -1.313597 |
| O             | -2.712276 | 1.189084  | -2.340383 | H            | -6.219314 | -0.894157 | -1.883113 |
| C             | -3.040072 | 0.304243  | -0.077453 | H            | -6.214213 | 1.467916  | -1.180211 |
| C             | -4.541196 | 0.532407  | -0.196955 | H            | -4.268093 | 2.415930  | 0.091377  |
| C             | -4.204148 | -1.834657 | 0.152415  | N            | -2.085394 | -1.423127 | 0.191789  |
| H             | -4.054610 | -2.795418 | -0.347736 | H            | -1.049880 | 2.211704  | -0.604255 |
| H             | -4.614534 | -2.030472 | 1.152066  |              |           |           |           |

|              |           |           |           |              |           |           |           |
|--------------|-----------|-----------|-----------|--------------|-----------|-----------|-----------|
| C            | -0.331482 | -0.792096 | 3.049475  | C            | 3.193367  | -0.408554 | 0.593016  |
| H            | 0.617631  | -0.831183 | 3.595058  | H            | 5.101221  | 0.316811  | -2.166095 |
| H            | -0.851581 | 0.141137  | 3.283703  | H            | 6.592338  | -1.294333 | -0.993705 |
| H            | -0.942479 | -1.643971 | 3.363622  | H            | 5.933749  | -2.292621 | 1.161937  |
| C            | 1.092828  | -0.344875 | -1.194417 | H            | 3.722513  | -1.720438 | 2.206431  |
| C            | 0.506537  | -2.256795 | 1.185364  | N            | 2.579613  | 1.052681  | -1.024982 |
| H            | -0.238848 | -3.013899 | 1.456129  | H            | 0.909500  | -1.853001 | 0.538989  |
| H            | 1.392933  | -2.480869 | 1.783450  | C            | 0.012459  | 2.612490  | 0.965144  |
| H            | 0.756852  | -2.380516 | 0.128645  | H            | -0.812880 | 3.316244  | 0.830216  |
| C            | 3.090228  | 0.357605  | -0.022387 | H            | 0.894646  | 3.191155  | 1.256921  |
| N            | 2.415013  | -0.508896 | -1.002722 | H            | -0.209213 | 1.929912  | 1.783593  |
| N            | 1.471154  | 1.968630  | -0.573479 | C            | 0.490623  | 2.926098  | -1.465434 |
| C            | 2.813107  | 1.810686  | -0.420864 | H            | 1.283163  | 3.637407  | -1.212064 |
| O            | 3.658958  | 2.676688  | -0.546365 | H            | -0.439455 | 3.491128  | -1.578862 |
| C            | 2.396113  | 0.156360  | 1.348531  | H            | 0.709242  | 2.475548  | -2.440819 |
| H            | 2.805885  | 0.876754  | 2.062819  | O            | 1.353390  | 0.127581  | 2.133873  |
| H            | 2.644268  | -0.844230 | 1.714771  | C            | -0.797619 | 0.868142  | -0.819054 |
| C            | 4.547658  | -0.080822 | -0.110069 | C            | -2.262866 | 1.352663  | -0.693120 |
| H            | 5.061175  | 0.546147  | -0.845596 | H            | -2.694564 | 1.555174  | -1.677784 |
| H            | 5.064121  | 0.033547  | 0.845547  | H            | -2.350033 | 2.263214  | -0.093077 |
| C            | 4.458651  | -1.542749 | -0.582514 | H            | -0.584561 | 0.657610  | -1.876692 |
| H            | 5.383076  | -1.893900 | -1.044534 | C            | -0.654478 | -0.492651 | -0.084148 |
| H            | 4.233045  | -2.201391 | 0.263612  | C            | -1.577646 | -1.483588 | -0.833796 |
| C            | 3.277402  | -1.542778 | -1.562255 | C            | -3.078679 | 0.227853  | -0.017447 |
| H            | 3.588112  | -1.268264 | -2.577059 | N            | -2.844065 | -1.017571 | -0.767017 |
| H            | 2.737990  | -2.492403 | -1.614094 | N            | -1.193312 | -0.386185 | 1.275045  |
| H            | 0.519827  | 1.188364  | 1.781559  | C            | -2.464908 | 0.073122  | 1.388202  |
| O            | -1.741762 | 1.704518  | 1.701731  | O            | -3.035838 | 0.377219  | 2.421851  |
| O            | 0.379229  | -1.063288 | -1.885901 | C            | -4.595665 | 0.361698  | -0.014588 |
| H            | 1.085488  | 2.889076  | -0.736487 | H            | -4.936564 | 0.863243  | 0.892873  |
| H            | -1.769373 | -2.336351 | -0.117759 | H            | -4.916600 | 0.937799  | -0.890123 |
| TS67-neu-RRS |           |           |           | C            | -5.079968 | -1.094694 | -0.118709 |
| C            | 0.307373  | 1.877044  | -0.358907 | H            | -5.017412 | -1.568897 | 0.865925  |
| C            | 1.555243  | 1.055042  | -0.162458 | H            | -6.108363 | -1.176700 | -0.476037 |
| C            | 1.823551  | 0.101643  | 0.946575  | C            | -4.070560 | -1.747102 | -1.073619 |
| C            | 0.776230  | -0.970406 | -0.088663 | H            | -4.350382 | -1.600256 | -2.123889 |
| H            | 1.123537  | -1.185112 | -1.102064 | H            | -3.915560 | -2.815238 | -0.904489 |
| C            | 3.595547  | 0.168417  | -0.608740 | O            | -1.212740 | -2.506625 | -1.388942 |
| C            | 4.806744  | -0.131311 | -1.222202 | H            | -0.508210 | -0.300689 | 2.033632  |
| C            | 5.633878  | -1.033699 | -0.556969 | H            | 2.541758  | 1.466007  | -1.947351 |
| C            | 5.256400  | -1.603558 | 0.668210  | TS67-neu-SSR |           |           |           |
| C            | 4.030638  | -1.295624 | 1.256202  | C            | -0.646835 | -0.602032 | -0.176798 |

|   |           |           |           |   |           |           |           |
|---|-----------|-----------|-----------|---|-----------|-----------|-----------|
| C | -0.831194 | 0.486453  | 0.935819  | H | -0.640278 | -0.027090 | 1.880930  |
| C | 0.256783  | 1.620794  | 0.843246  | O | 1.564233  | -0.806351 | 2.042408  |
| C | 1.515941  | 0.950994  | 0.426671  | O | -1.517833 | -2.865279 | 0.296936  |
| C | 1.774046  | -0.513860 | 0.772473  | H | -0.407039 | -0.025111 | -2.268158 |
| C | 0.754062  | -1.218495 | -0.226531 | H | 2.540601  | 2.417922  | -0.599390 |
| H | 0.705095  | -2.248912 | 0.138434  |   |           |           |           |
| C | 3.572606  | 0.520007  | -0.420325 |   |           |           |           |
| C | 4.786596  | 0.710026  | -1.057201 |   |           |           |           |
| C | 5.661204  | -0.380504 | -1.053300 |   |           |           |           |
| C | 5.308556  | -1.581219 | -0.430263 |   |           |           |           |
| C | 4.067489  | -1.735982 | 0.197273  |   |           |           |           |
| C | 3.186363  | -0.667826 | 0.190554  |   |           |           |           |
| H | 5.055639  | 1.650202  | -1.529087 |   |           |           |           |
| H | 6.629797  | -0.286887 | -1.532735 |   |           |           |           |
| H | 6.016018  | -2.404312 | -0.430487 |   |           |           |           |
| H | 3.794542  | -2.660754 | 0.696348  |   |           |           |           |
| N | 2.508759  | 1.468360  | -0.240834 |   |           |           |           |
| H | 1.118627  | -1.234850 | -1.261960 |   |           |           |           |
| C | 0.509002  | 2.136403  | 2.285416  |   |           |           |           |
| H | 0.887284  | 1.319610  | 2.905387  |   |           |           |           |
| H | -0.439637 | 2.506975  | 2.688873  |   |           |           |           |
| H | 1.226442  | 2.963644  | 2.281590  |   |           |           |           |
| C | -1.732013 | -1.689749 | 0.061646  |   |           |           |           |
| C | -0.060637 | 2.817014  | -0.069018 |   |           |           |           |
| H | 0.794484  | 3.503184  | -0.098841 |   |           |           |           |
| H | -0.885540 | 3.406892  | 0.334593  |   |           |           |           |
| H | -0.312231 | 2.520715  | -1.090162 |   |           |           |           |
| C | -3.029980 | 0.324962  | -0.283958 |   |           |           |           |
| N | -2.954135 | -1.121615 | -0.042758 |   |           |           |           |
| N | -0.991018 | 0.064288  | -1.446910 |   |           |           |           |
| C | -2.240480 | 0.594872  | -1.572807 |   |           |           |           |
| O | -2.657597 | 1.193364  | -2.548558 |   |           |           |           |
| C | -2.284952 | 1.020245  | 0.875001  |   |           |           |           |
| H | -2.820262 | 0.787661  | 1.800809  |   |           |           |           |
| H | -2.334897 | 2.102482  | 0.733667  |   |           |           |           |
| C | -4.530562 | 0.592102  | -0.378527 |   |           |           |           |
| H | -4.793157 | 1.579299  | 0.009044  |   |           |           |           |
| H | -4.828324 | 0.555330  | -1.430875 |   |           |           |           |
| C | -5.162496 | -0.561094 | 0.422294  |   |           |           |           |
| H | -5.136188 | -0.338343 | 1.494125  |   |           |           |           |
| H | -6.201356 | -0.745301 | 0.142117  |   |           |           |           |
| C | -4.252613 | -1.760058 | 0.123896  |   |           |           |           |
| H | -4.203569 | -2.496991 | 0.928658  |   |           |           |           |
| H | -4.547025 | -2.274779 | -0.799036 |   |           |           |           |



## References:

1. P. Pracht, F. Bohle and S. Grimme, Automated Exploration of the Low-Energy Chemical Space with Fast Quantum Chemical Methods, *Phys. Chem. Chem. Phys.*, 2020, **22**, 7169-7192.
2. C. Bannwarth, S. Ehlert and S. Grimme, GFN2-xTB-An Accurate and Broadly Parametrized Self-Consistent Tight-Binding Quantum Chemical Method with Multipole Electrostatics and Density-Dependent Dispersion Contributions, *J. Chem. Theory Comput.*, 2019, **15**, 1652-1671.
3. Y. Zhao and D. G. Truhlar, The M06 Suite of Density Functionals for Main Group Thermochemistry, Thermochemical Kinetics, Noncovalent Interactions, Excited States, and Transition Elements: Two New Functionals and Systematic Testing of Four M06-Class Functionals and 12 Other Functionals, *Theor. Chem. Acc.*, 2008, **120**, 215-241.
4. V. A. Rassolov, M. A. Ratner, J. A. Pople, P. C. Redfern and L. A. Curtiss, 6-31G\* Basis Set for Third-Row Atoms, *J. Comput. Chem.*, 2001, **22**, 976-984.
5. M. M. Francl, W. J. Pietro, W. J. Hehre, J. S. Binkley, M. S. Gordon, D. J. Defrees and J. A. Pople, Self-Consistent Molecular Orbital Methods. XXIII. A Polarization-Type Basis Set for Second-Row Elements, *J. Chem. Phys.*, 1982, **77**, 3654-3665.
6. Harihara.Pc and J. A. Pople, The Influence of Polarization Functions on Molecular Orbital Hydrogenation Energies, *Theor. Chim. Acta*, 1973, **28**, 213-222.
7. W. J. Hehre, R. Ditchfield and J. A. Pople, Self-Consistent Molecular Orbital Methods. XII. Further Extensions of Gaussian-Type Basis Sets for Use in Molecular Orbital Studies of Organic Molecules, *J. Chem. Phys.*, 1972, **56**, 2257-2261.
8. T. Clark, J. Chandrasekhar, G. W. Spitznagel and P. V. Schleyer, Efficient Diffuse Function-Augmented Basis Sets for Anion Calculations. III. The 3-21+G Basis Set for First-Row Elements, Li-F, *J. Chem. Phys.*, 1983, **4**, 294-301.
9. S. Grimme, J. Antony, S. Ehrlich and H. Krieg, A Consistent and Accurate ab Initio Parametrization of Density Functional Dispersion Correction (DFT-D) for the 94 Elements H-Pu, *J. Chem. Phys.*, 2010, **132**, 154104.
10. L. Goerigk, A. Hansen, C. Bauer, S. Ehrlich, A. Najibi and S. Grimme, A Look at the Density Functional Theory Zoo with the Advanced GMTKN55 Database for General Main Group Thermochemistry, Kinetics and Noncovalent Interactions, *Phys. Chem. Chem. Phys.*, 2017, **19**, 32184-32215.
11. S. Grimme, Supramolecular Binding Thermodynamics by Dispersion-Corrected Density Functional Theory, *Chem. - Eur. J.*, 2012, **18**, 9955-9964.
12. G. Luchini, J. V. Alegre-Requena, I. Funes-Ardoiz and R. S. Paton, GoodVibes: Automated Thermochemistry for Heterogeneous Computational Chemistry Data, *F1000Research*, 2020, **9**, 291.
13. I. M. Alecu, J. Zheng, Y. Zhao and D. G. Truhlar, Computational Thermochemistry: Scale Factor Databases and Scale Factors for Vibrational

- Frequencies Obtained from Electronic Model Chemistries, *J. Chem. Theory Comput.*, 2010, **6**, 2872-2887.
14. C. Riplinger, P. Pinski, U. Becker, E. F. Valeev and F. Neese, Sparse Maps-A Systematic Infrastructure for Reduced-Scaling Electronic Structure Methods. II. Linear Scaling Domain Based Pair Natural Orbital Coupled Cluster Theory, *J. Chem. Phys.*, 2016, **144**, 024109.
  15. C. Riplinger, B. Sandhoefer, A. Hansen and F. Neese, Natural Triple Excitations in Local Coupled Cluster Calculations with Pair Natural Orbitals, *J. Chem. Phys.*, 2013, **139**, 134101.
  16. C. Riplinger and F. Neese, An Efficient and Near Linear Scaling Pair Natural Orbital Based Local Coupled Cluster Method, *J. Chem. Phys.*, 2013, **138**, 034106.
  17. J. A. Pople, M. Headgordon and K. Raghavachari, Quadratic Configuration Interaction. A General Technique for Determining Electron Correlation Energies, *J. Chem. Phys.*, 1987, **87**, 5968-5975.
  18. G. D. Purvis and R. J. Bartlett, A Full Coupled-Cluster Singles and Doubles Model: The Inclusion of Disconnected Triples, *J. Chem. Phys.*, 1982, **76**, 1910-1918.
  19. T. H. Dunning, Gaussian Basis Sets for Use in Correlated Molecular Calculations. I. The Atoms Boron through Neon and Hydrogen, *J. Chem. Phys.*, 1989, **90**, 1007-1023.
  20. E. R. Davidson, Comment on Dunning's Correlation-Consistent Basis Sets - Comment, *Chem. Phys. Lett.*, 1996, **260**, 514-518.
  21. D. E. Woon and T. H. Dunning, Gaussian Basis Sets for Use in Correlated Molecular Calculations. III. The Atoms Aluminum through Argon, *J. Chem. Phys.*, 1993, **98**, 1358-1371.
  22. E. Cancès, B. Mennucci and J. Tomasi, A New Integral Equation Formalism for the Polarizable Continuum Model: Theoretical Background and Applications to Isotropic and Anisotropic Dielectrics, *J. Chem. Phys.*, 1997, **107**, 3032-3041.
  23. B. Mennucci, E. Cancès and J. Tomasi, Evaluation of Solvent Effects in Isotropic and Anisotropic Dielectrics and in Ionic Solutions with a Unified Integral Equation Method: Theoretical Bases, Computational Implementation, and Numerical Applications, *J. Phys. Chem. B*, 1997, **101**, 10506-10517.
  24. G. Scalmani and M. J. Frisch, Continuous Surface Charge Polarizable Continuum Models of Solvation. I. General Formalism, *J. Chem. Phys.*, 2010, **132**, 114110.
  25. J. Tomasi, B. Mennucci and E. Cancès, The IEF Version of the PCM Solvation Method: An Overview of a New Method Addressed to Study Molecular Solutes at the QM ab Initio Level, *J. Mol. Struct.: THEOCHEM*, 1999, **464**, 211-226.
  26. B. Mennucci and J. Tomasi, Continuum Solvation Models: A New Approach to the Problem of Solute's Charge Distribution and Cavity Boundaries, *J. Chem. Phys.*, 1997, **106**, 5151-5158.
  27. A. V. Marenich, C. J. Cramer and D. G. Truhlar, Universal Solvation Model Based on Solute Electron Density and on a Continuum Model of the Solvent

- Defined by the Bulk Dielectric Constant and Atomic Surface Tensions, *J. Phys. Chem. B*, 2009, **113**, 6378-6396.
28. F. Neese, Software Update: The ORCA Program System, Version 4.0, *Wiley Interdiscip. Rev.: Comput. Mol. Sci.*, 2018, **8**, e1327.
  29. F. Neese, The ORCA Program System, *Wiley Interdiscip. Rev.: Comput. Mol. Sci.*, 2012, **2**, 73-78.
  30. D. G. Liakos, M. Sparta, M. K. Kesharwani, J. M. L. Martin and F. Neese, Exploring the Accuracy Limits of Local Pair Natural Orbital Coupled-Cluster Theory, *J. Chem. Theory Comput.*, 2015, **11**, 1525-1539.
  31. J. Rezac and P. Hobza, Describing Noncovalent Interactions beyond the Common Approximations: How Accurate Is the "Gold Standard," CCSD(T) at the Complete Basis Set Limit?, *J. Chem. Theory Comput.*, 2013, **9**, 2151-2155.
  32. D. G. Truhlar, Basis-Set Extrapolation, *Chem. Phys. Lett.*, 1998, **294**, 45-48.
  33. M. J. Frisch, G. W. Trucks, H. B. Schlegel, G. E. Scuseria, M. A. Robb, J. R. Cheeseman, G. Scalmani, V. Barone, G. A. Petersson, H. Nakatsuji, X. Li, M. Caricato, A. V. Marenich, J. Bloino, B. G. Janesko, R. Gomperts, B. Mennucci, H. P. Hratchian, J. V. Ortiz, A. F. Izmaylov, J. L. Sonnenberg, D. Williams-Young, F. Ding, F. Lipparini, F. Egidi, J. Goings, B. Peng, A. Petrone, T. Henderson, D. Ranasinghe, V. G. Zakrzewski, J. Gao, N. Rega, G. Zheng, W. Liang, M. Hada, M. Ehara, K. Toyota, R. Fukuda, J. Hasegawa, M. Ishida, T. Nakajima, Y. Honda, O. Kitao, H. Nakai, T. Vreven, K. Throssell, J. A. Montgomery, Jr.; , J. E. Peralta, F. Ogliaro, M. J. Bearpark, J. J. Heyd, E. N. Brothers, K. N. Kudin, V. N. Staroverov, T. A. Keith, R. Kobayashi, J. Normand, K. Raghavachari, A. P. Rendell, J. C. Burant, S. S. Iyengar, J. Tomasi, M. Cossi, J. M. Millam, M. Klene, C. Adamo, R. Cammi, J. W. Ochterski, R. L. Martin, K. Morokuma, O. Farkas, J. B. Foresman and D. J. Fox, Gaussian 16, Revision C.01. *Journal*, 2016.
  34. C. Y. Legault, CYLview. *Journal*, **2009**.
  35. T. Lu and F. Chen, Multiwfn: A Multifunctional Wavefunction Analyzer, *J. Comput. Chem.*, 2012, **33**, 580-592.
  36. W. Humphrey, A. Dalke and K. Schulten, VMD: Visual Molecular Dynamics, *J. Mol. Graphics Modell.*, 1996, **14**, 33-38.
